1 **Full title: Assessment of sewer connectivity in the United States and its implications for**  
2 **equity in wastewater-based epidemiology**

3

4 **Short title: Sewer connectivity and equity in wastewater-based epidemiology**

5

6 **Authors:** QinQin Yu<sup>1</sup>, Scott W. Olesen<sup>2</sup>, Claire Duvallet<sup>2</sup>, Yonatan H. Grad<sup>1\*</sup>

7

8 **Affiliations:**

9 1. Department of Immunology and Infectious Diseases, Harvard T. H. Chan School of  
10 Public Health, Boston, Massachusetts, USA

11 2. Biobot Analytics, Inc., Cambridge, Massachusetts, USA

12

13 \*Corresponding author

14 Email: [ygrad@hsph.harvard.edu](mailto:ygrad@hsph.harvard.edu) (YG)

## 15 **Abstract**

16 Wastewater-based epidemiology is a promising public health tool that can yield a more  
17 representative view of the population than case reporting. However, only about 80% of the U.S.  
18 population is connected to public sewers, and the characteristics of populations missed by  
19 wastewater-based epidemiology are unclear. To address this gap, we used publicly available  
20 datasets to assess sewer connectivity in the U.S. by location, demographic groups, and  
21 economic groups. Data from the U.S. Census' American Housing Survey revealed that sewer  
22 connectivity was lower than average for American Indian and Alaskan Native, White, non-  
23 Hispanic, older, not in poverty, and larger households, but smaller geographic scales revealed  
24 local variations from this national connectivity pattern. For example, data from the U.S.  
25 Environmental Protection Agency showed that sewer connectivity was positively correlated with  
26 income in Minnesota, Florida, and California. Data from the U.S. Census' American Community  
27 Survey and Environmental Protection Agency also revealed geographic areas with low sewer  
28 connectivity, such as Alaska, the Navajo Nation, Minnesota, Michigan, and Florida. However,  
29 with the exception of the U.S. Census data, there were inconsistencies across datasets. Using  
30 mathematical modeling to assess the impact of wastewater sampling inequities on inferences  
31 about epidemic trajectory at a local scale, we found that in some situations, even weak  
32 connections between communities may allow wastewater monitoring in one community to serve  
33 as a reliable proxy for an interacting community with no wastewater monitoring, when cases are  
34 widespread. A systematic, rigorous assessment of sewer connectivity will be important for  
35 ensuring an equitable and informed implementation of wastewater-based epidemiology as a  
36 public health monitoring system.

## 37 Introduction

38 Wastewater-based epidemiology (WBE) plays an important role in surveillance of SARS-CoV-2  
39 [1,2], polio virus [3,4] and other pathogens [5,6] and has applications to monitoring a variety of  
40 other public health concerns [7], including opioid usage [8]. One proposed benefit of  
41 wastewater-based epidemiology is that wastewater data is more representative of the  
42 population than case reporting, which can be biased towards those with health-seeking behavior  
43 or access to healthcare. For example, the populations served by the Health and Human  
44 Services SARS-CoV-2 National Wastewater Surveillance System were more representative of  
45 the entire US's age distribution and Black and Hispanic populations than the vaccinated  
46 population [9].

47  
48 While WBE offers convenient sampling of populations served by public sewers, about 20% of  
49 individuals in the US live in homes not connected to public sewers [10,11]. This includes those  
50 on decentralized wastewater systems and those with no wastewater treatment systems. The  
51 most common decentralized wastewater system is septic tanks [12], which collect and treat  
52 wastewater onsite, typically the yard of the home. Households without wastewater treatment  
53 systems may have outhouses or privies, chemical toilets, or no plumbing. Variability in sewer  
54 connectivity exists across the U.S., with more connectivity in urban areas than rural areas  
55 [10,13].

56  
57 As with any emerging public health tools, it is important to ask to what extent the tool  
58 exacerbates or alleviates inequities. A few studies have evaluated equity of sewer connectivity  
59 on broad geographic scales. A 2017 study from Environmental Protection Agency Office of  
60 Water showed that households in the U.S. that earned less than the national median household  
61 income (MHI, \$61,000) were almost 10% more likely to have a decentralized wastewater

62 system or no wastewater treatment system compared to households that earned more than the  
63 MHI [14]. Additionally, this study found that as household income decreased, decentralized  
64 wastewater system usage increased in Florida, Hawaii, and Delaware, but not in Rhode Island.  
65 Based on the 2019 U.S. Census Bureau's American Housing Survey, rural areas are less  
66 connected to sewers, and while the income in rural areas was lower than in metropolitan areas,  
67 households connected to septic tanks were wealthier than those connected to sewers in both  
68 rural and metropolitan areas [10].  
69  
70 However, we have an incomplete understanding of the factors associated with sewer  
71 connectivity across the US and the implications for the interpretation of wastewater data. In this  
72 study, we sought to address the following questions, focusing our analyses on the U.S.: (1) To  
73 what extent is there demographic and economic inequity in sewer connectivity? (2) Which  
74 geographic areas have low sewer connectivity? (3) What is the applicability of WBE data to  
75 neighboring unsampled communities? To address the first question, we analyzed household-  
76 level data of sewer connectivity stratified by geographic, demographic, and economic variables.  
77 For the second question, we evaluated datasets aggregated at the county or county subdivision  
78 levels to qualitatively identify geographic areas that have low sewer connectivity. To address the  
79 third question, we used a mathematical model to simulate WBE in two interacting populations.

80

## 81 **Methods**

### 82 **Dataset compilation**

83 We used a convenience sample of publicly available datasets on sewer connectivity, septic  
84 connectivity, or no plumbing at the household level. The types of data included household-level  
85 data, locations of sewer systems and population served, and population served by or lacking

86 wastewater systems aggregated by county or county subdivision. All datasets are summarized  
 87 in **Table 1** and described in more detail in the Supplementary Information.

88

89 **Table 1: Datasets used in this study.**

| Dataset                                    | Location                  | Year(s)          | Description                                                                                                                                                                                                                                  | Sampling method                                                                                                                                                                                          | Dataset completeness and potential biases                                                                                                                                                                                                                                                                         | Ref.       |
|--------------------------------------------|---------------------------|------------------|----------------------------------------------------------------------------------------------------------------------------------------------------------------------------------------------------------------------------------------------|----------------------------------------------------------------------------------------------------------------------------------------------------------------------------------------------------------|-------------------------------------------------------------------------------------------------------------------------------------------------------------------------------------------------------------------------------------------------------------------------------------------------------------------|------------|
| American Housing Survey                    | US excluding Island areas | 2013, 2019, 2021 | This was a longitudinal survey of housing, demographic, and economic characteristics of approximately 60,000-80,000 representative households.                                                                                               | The sampling method was a representative sample of all U.S. households at the time of sample selection (most recently in 2015 and before that, in 1985). New housing units were added each survey cycle. | The survey excludes group quarters, businesses, hotels, and motels. Additionally, the survey was more likely to classify rural seasonal homes as vacant units, counted large cluster septic systems as public sewer, and was thought to lose new households built in rural areas due to its longitudinal design.  | [11,15–19] |
| American Community Survey 5-year estimates | US excluding Island areas | 2021             | This was a monthly survey of characteristics of populations and households of a representative subsample of addresses in the US. The survey reports the number of households lacking complete plumbing facilities by geographic subdivision. | The survey was sent to a random sample of addresses in the U.S. every month. Each address was selected no more than once every 5 years.                                                                  | The surveys were completed by self-response (although a subset of non-responses were followed up with personal visits). Responses were reviewed for completeness and questionnaires needing clarification were followed up by phone calls. The data was averaged over 5 years to reduce statistical fluctuations. | [20]       |
| Florida Department of Health               | Florida                   | Up to 2012       | This dataset includes the onsite sewage treatment and disposal systems locations                                                                                                                                                             | The sample included onsite sewage treatment and disposal system permits recorded in the                                                                                                                  | As of 2022, a permit was required for construction and inspection was recommended every 3-5 years after. From this dataset, an estimated 7% of households                                                                                                                                                         | [22]       |

|                                         |                 |      |                                                                                                                                                                                                                                           |                                                              |                                                                                                                                                                                                                                                                                                                                                                                                                                                                                                                                                                                                                                                                                                                                                                |         |
|-----------------------------------------|-----------------|------|-------------------------------------------------------------------------------------------------------------------------------------------------------------------------------------------------------------------------------------------|--------------------------------------------------------------|----------------------------------------------------------------------------------------------------------------------------------------------------------------------------------------------------------------------------------------------------------------------------------------------------------------------------------------------------------------------------------------------------------------------------------------------------------------------------------------------------------------------------------------------------------------------------------------------------------------------------------------------------------------------------------------------------------------------------------------------------------------|---------|
| septic tank inspections                 |                 |      | inspected by the Florida Department of Health reported in June 2012.                                                                                                                                                                      | Florida Department of Health system.                         | were connected to septic tanks across the state. This was substantially less than the Florida Department of Environmental Protection's estimate that approximately one third of Florida's population used septic tanks [21].                                                                                                                                                                                                                                                                                                                                                                                                                                                                                                                                   |         |
| EPA Clean Watersheds Needs Survey       | US              | 2012 | This survey included voluntary submissions of the locations of publicly owned wastewater collection and treatment facilities and their estimated population served for the purposes to assess funding needs for treatment works projects. | The responses were coordinated by states.                    | This survey had voluntary responses and variable effort and resources that each state put into the survey. States that had the most comprehensive responses were New York, California, Florida, New Jersey, Maryland, Iowa, Minnesota and Michigan. Missing facilities included those in South Carolina, the Northern Mariana Islands, and American Samoa; facilities whose projects did not have documented solutions or cost estimates; privately owned wastewater facilities; facilities on tribal lands and Alaskan Native Villages; and facilities whose projects received funding from other sources. Small community facilities are thought to be underrepresented due to having less resources for completing the survey, but this was not quantified. | [23,24] |
| US Census Island Areas Decennial Survey | US Island Areas | 2020 | This was a survey of housing, social, and economic information of all housing units.                                                                                                                                                      | The survey was conducted via in person and phone interviews. | The COVID-19 pandemic impacted collection of data on group quarters [25] and the survey had higher nonresponse rates than previous years' surveys, particularly for Guam. Quality control checks were performed on responses.                                                                                                                                                                                                                                                                                                                                                                                                                                                                                                                                  | [26]    |

90 The datasets are further described in the S1 Appendix and the dataset completeness and  
 91 potential biases are further assessed in the S2 Appendix. Additional datasets that are briefly

92 described in the main text but primarily analyzed in the Supplementary information are  
93 summarized in **Table S 3**.

## 94 **Calculation of weights, error bars, and summary statistics in** 95 **American Housing Survey (AHS) data**

96 All summary statistics were calculated by applying the weights reported in the AHS Public Use  
97 File [19]. Because not every household was sampled and there was uneven sampling of  
98 households across the U.S., the weight estimates the number of similar households that each  
99 surveyed household represented. Error bars on summary statistics represent the middle 95% of  
100 values calculated using the reported replicate weights (160 replicate weights per household).  
101 Each summary statistic was calculated for each replicate separately before taking the middle  
102 95% of values. Only categories with at least 5 households were used.

103

## 104 **Analysis of sewer connectivity by urban or rural areas in**

### 105 **AHS data**

106 We used the most recent AHS National Sample with publicly available data on the urban or rural  
107 location of the household (2013) which categorized households into being in a central city of a  
108 Metropolitan Statistical Area (MSA), in an urban area of an MSA but not in a central city, in a  
109 rural area of an MSA but not in a central city, in an urban outside of an MSA, or in a rural area  
110 outside of an MSA [27]. Central cities are defined as having either (1)  $\geq 250,000$  population or at  
111 least 100,000 people working within corporate limits, (2)  $\geq 25,000$  population, at least 75 jobs for  
112 each 100 residents who were employed, and 60% or fewer of the city's resident workers  
113 commuted to jobs outside, or (3) 15,000-25,000 population, at least one third the size of the  
114 metropolitan statistical area's largest city, and met the two commuting requirements in (2).  
115 Metropolitan Statistical Areas were defined as whole counties that have significant levels of

116 community and contiguous urban areas in common and includes rural areas. Urban areas were  
117 defined as having  $\geq 2500$  people, with at least 1500 residing outside of institutional group  
118 quarters. Rural areas were defined as those not in urban areas.

119

## 120 **Analyses of geographic areas with low connectivity to sewer**

121 Data of individual locations of septic tanks or sewer collection systems, when they existed, were  
122 aggregated based on latitude and longitude into county or county subdivision boundaries as  
123 defined by the U.S. Census' TIGER shapefiles of the corresponding year [28]. To calculate the  
124 fraction of a geographic area connected to septic or sewer, the total population size or total  
125 number of households in that geographic area was taken from the corresponding year in the  
126 American Community Survey (ACS) 5-year estimate [20]. For county subdivision and census  
127 designated place analyses, only areas with at least 5 households and 20 population size were  
128 used for the analyses. Detailed data analyses of the state and island area datasets are  
129 described in the Supplementary information.

130

131 Counties and county subdivisions were classified into Metropolitan statistical areas (at least one  
132 urbanized area of 50,000 or more population), Micropolitan statistical areas (at least one urban  
133 cluster of 10,000-50,000 population), or Rural areas (all other areas) using the U.S. Census  
134 classification of the encompassing Core Based Statistical Area (core area containing a  
135 substantial population nucleus together with adjacent territory that has a high degree of social  
136 and economic integration with the core as measured by commuting ties) [29].

137

## 138 **Demographic and economic variable correlations with sewer** 139 **or septic connectivity**



140 To assess correlations of demographic and economic variables with sewer and septic  
141 connectivity when aggregating at the county, county subdivision, or census designated place  
142 levels, we used the ACS 5-year estimates from the corresponding year and geographic scale.  
143 Only geographic subdivisions with at least 5 households and 20 population size were used. The  
144 Pearson correlation coefficient between demographic or economic variables of interest and the  
145 percentage of households in a geographic subdivision connected to septic tanks or sewer was  
146 calculated using the `stats.pearsonr` function in the `scipy` package (version 1.10.1) in Python  
147 (version 3.11.0). A Bonferroni correction was applied to correct for multiple hypothesis testing to  
148 calculate the  $q$  values.

149

## 150 **Simulations of interacting populations and wastewater**

### 151 **sampling**

152 Two interacting populations (A and B) were modeled in a deterministic compartmental model  
153 with susceptible, infected, and recovered (SIR) compartments for each population and a  
154 fraction,  $\varepsilon$ , of cross-population contacts. The base parameters were set at population size  
155  $N_A=N_B=5000$ , recovery rate  $\gamma=0.18$  inverse days (corresponding to an infectious period of 5.6  
156 days), basic reproduction number  $R_0^A = R_0^B = \frac{\beta_A}{\gamma_I} = \frac{\beta_B}{\gamma_I} = 1.5$  and were varied in sensitivity  
157 analyses. The differential equations were solved using the `integrate.odeint` function in the `scipy`  
158 package (version 1.6.2) in Python (version 3.11.0) using a timestep of 0.1 days.

159

160 Wastewater sampling was modeled by the number of copies of pathogen genetic material shed  
161 per day by each population divided the volume of sampled wastewater produced per day by  
162 each population. Both numerator and denominator depended on the fraction of waste produced

163 (including shed pathogen genetic material) by each population that is sampled by wastewater,  $f_A$   
164 and  $f_B$ . A detailed description of the simulations is provided in S1 Appendix.

165

## 166 **Code availability**

167 All code and data to reproduce the analyses and simulations are available at

168 [https://github.com/gradlab/wastewater\\_equity](https://github.com/gradlab/wastewater_equity).

169

## 170 **Results**

### 171 **Is there inequity in who is sampled by wastewater?**

172 To address this question, we used the American Housing Survey (AHS), a biannual longitudinal  
173 survey of representative housing units within the U.S that reports household-level data of sewer  
174 connectivity, demographic factors, and economic factors (**Table 1**). We focused our analyses on  
175 geographic scales with a reliable sample size for statistical analyses (census division,  
176 urban/rural at the national level, metropolitan statistical areas) [30].

177

178 According to the 2021 AHS, 83% of US households were connected to public sewers and 16%  
179 to standard septic tanks (**Fig S 1**). Each of the other forms of sewage disposal (non-standard  
180 septic tanks, chemical toilets, outhouses or privies, other, none, or not reported) was more than  
181 an order of magnitude less common (**Fig S 1**). Across census divisions in 2021, the western US  
182 was overall better connected to sewers than the eastern US, with the highest levels of sewer  
183 connection in the Pacific (91.3% of households, CI: 90.8%-91.7%) and Mountain (87.6% of  
184 households, CI: 86.8%-88.4%) divisions and the lowest levels of sewer connection in the New  
185 England (72.9% of households, CI:72.1%-74.0%) and East South Central (74.9% of  
186 households, CI: 73.7%-76.3%) divisions (**Fig 1**).

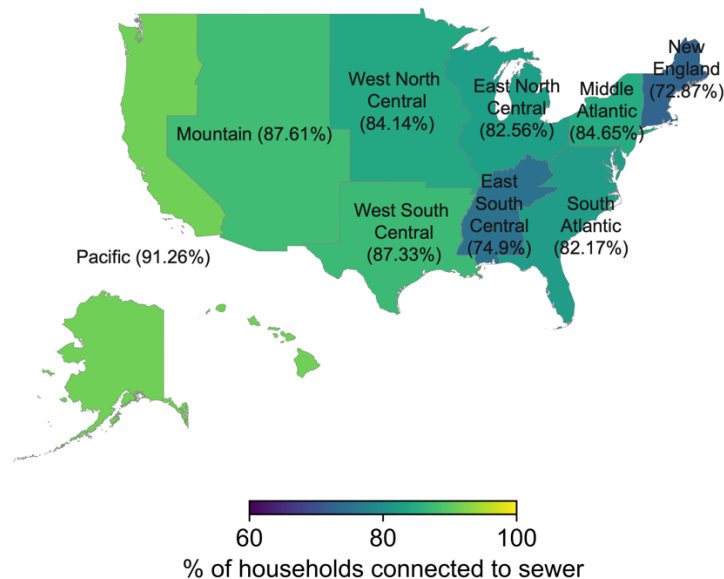

187

188 **Fig 1: The percentage of households connected to sewers in each census division.** Data

189 are from the 2021 American Housing Survey National Survey [11].

190

191 Across census divisions, households with an Asian, Black or African American, or Native  
192 Hawaiian and Other Pacific Islander householder (the owner or renter of the unit) were on  
193 average 14.0%, 13.1%, and 12.5% more connected to sewers, respectively, than the overall  
194 census division; however, specifically in the Pacific census division, households with a Native  
195 Hawaiian and Other Pacific Islander householder were 5.3% less connected to sewers than the  
196 overall census division (**Fig 2**). Households with an American Indian and Alaska Native or White  
197 householder were both on average 2.6% less connected to sewers than the overall census  
198 division. Across census divisions, households with a Hispanic householder were on average  
199 11.7% more connected to sewers whereas households with a non-Hispanic householder were  
200 1.1% less connected to sewers than the overall census division.

201

202 Connection to sewers decreased with the age of the householder (**Fig 2**), with the exception  
203 that households with a householder aged 75+ were better connected in most census divisions  
204 than those with a householder aged 65-74 (79.7% vs 77.9% of households). Households with 1  
205 person were on average 4.2% more connected whereas households with 2 people were on  
206 average 3.6% less connected to sewers than the overall census division. There were no  
207 consistent trends across census divisions for households with more than 2 people. Additionally,  
208 households that were in poverty were better connected to sewers (average of 87.5% of  
209 households across census divisions) than households not in poverty (82.7% of households  
210 across census divisions; **Fig 2**). The threshold used to determine whether a household was in  
211 poverty depended on family size and age of persons in the household; for example, in 2021 the  
212 threshold for 1 person under 65 years is \$14,097 and for 4 persons with two children is \$27,479  
213 [31].

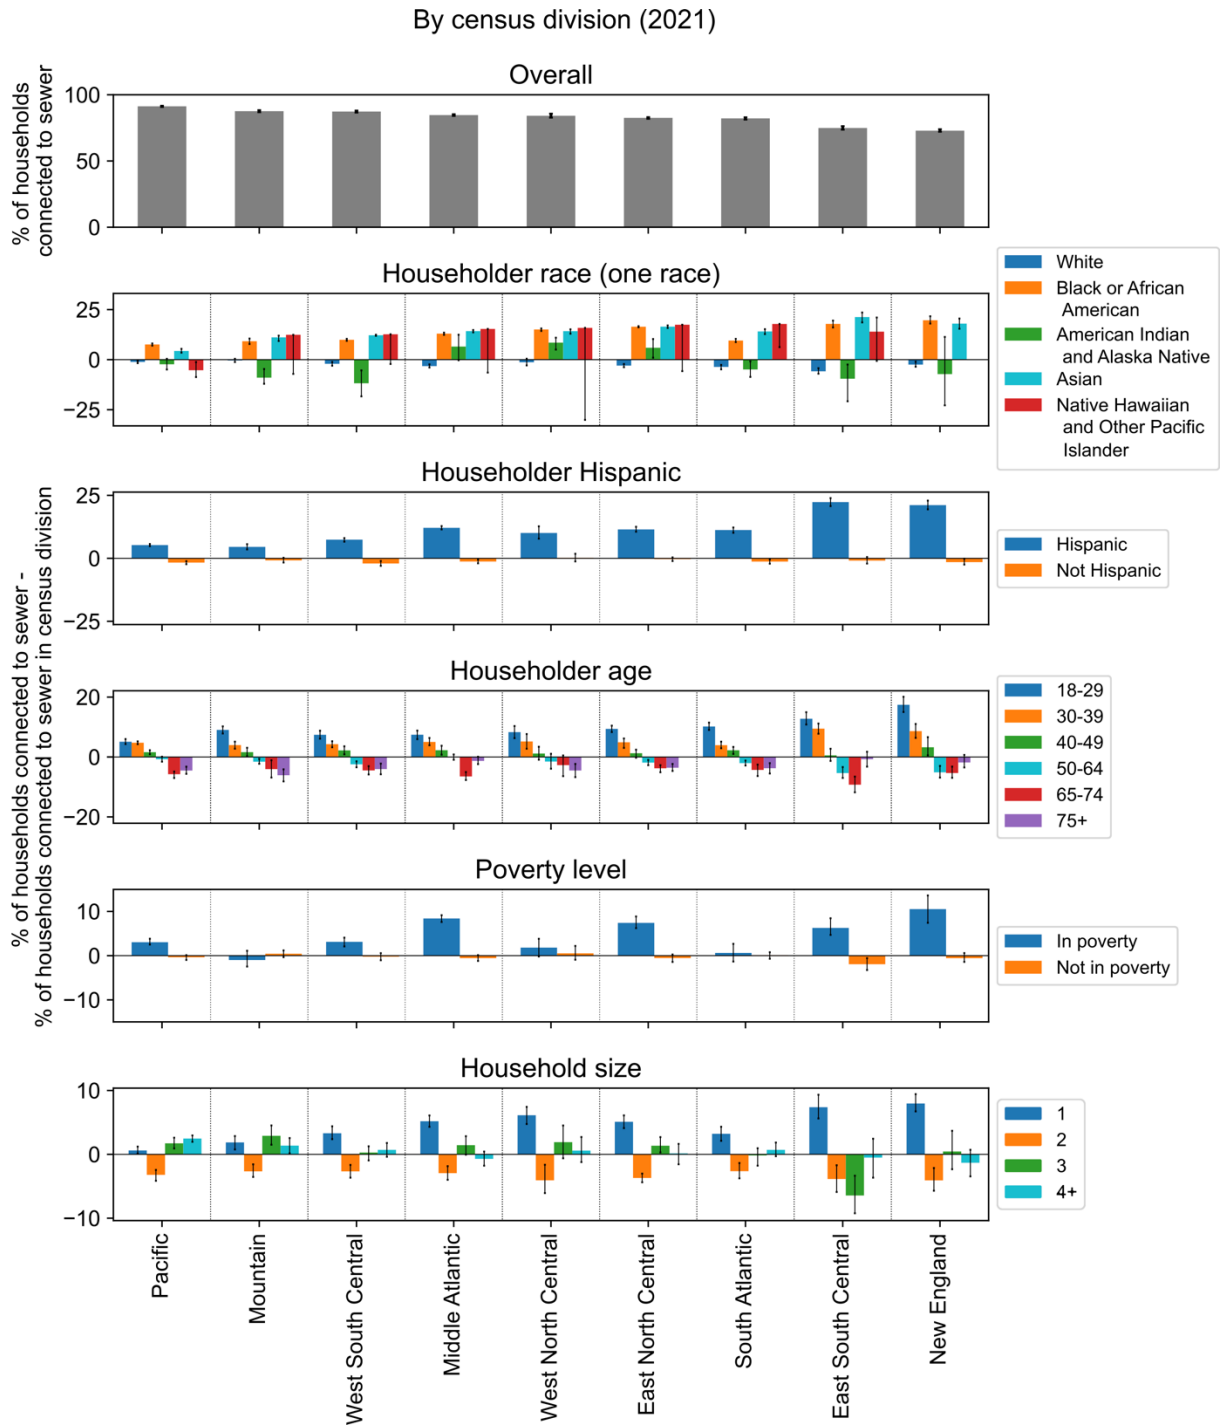

214

215 **Fig 2: The percentage of households connected to sewers in each census division by**  
 216 **demographic and economic characteristics.** Data are from the 2021 American Housing  
 217 Survey National Survey [11].

218

219 We sought to describe how the differences in sewer connection between demographic and  
220 economic groups observed at the census division level was affected by household location in  
221 urban or rural areas (see Methods). The qualitative trends observed at the census division level  
222 for race, ethnicity, age, household size, and poverty level were largely preserved across  
223 national urban and rural areas (**Fig 3**). One notable exception was that lower sewer connectivity  
224 for households with an American Indian and Alaska Native or Hawaiian and Other Pacific  
225 Islander householder compared to those with a Black or Asian householder was only observed  
226 in locations inside of an Metropolitan Statistical Area (MSA) but outside of a central city (both  
227 urban and rural). In central cities and locations outside of an MSA (both urban and rural),  
228 households with an American Indian and Alaska Native or Hawaiian and Other Pacific Islander  
229 householder had similar levels of sewer connectivity as households with a Black or Asian  
230 householder.

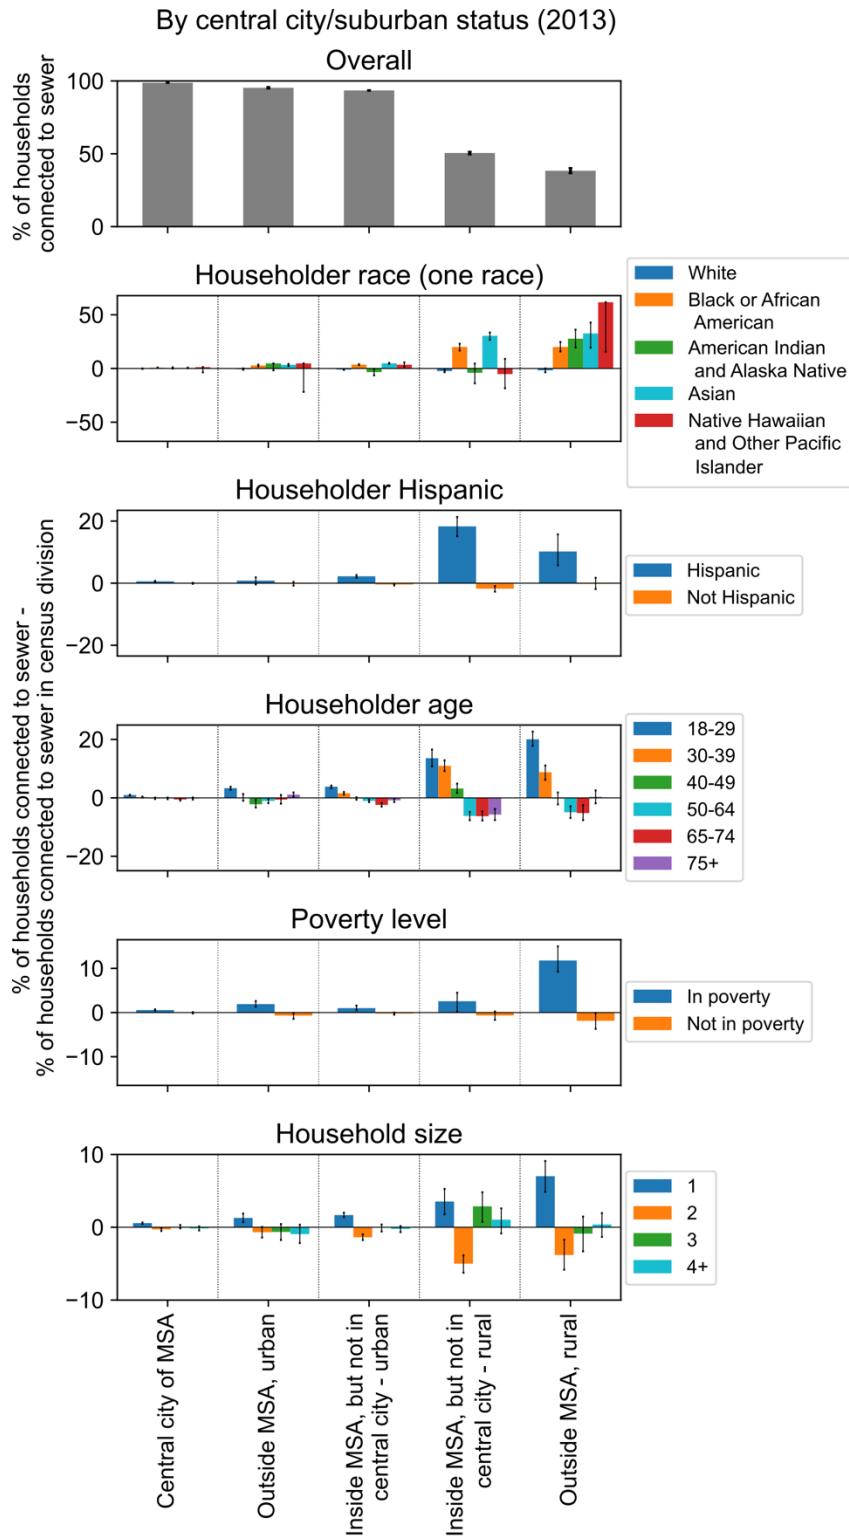

232 **Fig 3: The percentage of households connected to sewers by urban and rural**  
233 **categorizations and by demographic and economic characteristics.** See Methods for  
234 definitions of Metropolitan Statistical Area (MSA), central city, urban, and rural. Data from the  
235 2013 American Housing Survey National Survey [32]. MSA: metropolitan statistical area.  
236  
237 Next, we assessed sewer connectivity in large metropolitan areas, which was the smallest  
238 geographic scale resolved by the AHS due to sample size. In 35 of the largest metropolitan  
239 areas in 2019 and 2021, household connectivity to sewers ranges from 69.2% (Birmingham-  
240 Hoover, AL) to 99.4% (LA-Long Beach-Anaheim, CA) (**Fig S 2**). In each metropolitan area,  
241 households with a White or American Indian and Alaska Native householder, with an older  
242 householder, not in poverty, with a larger household size, and with a non-Hispanic householder  
243 were less connected to sewers than the average household, which was similar to what was  
244 seen when stratifying by census division. Exceptions were lower connectivity for households  
245 with a Hispanic householder in San Jose, CA (Hispanic householder: 96.1% of households, CI:  
246 95.1%-97.2%; non-Hispanic householder: 97.8% of households, CI: 97.5%-98.2%) and lower  
247 connectivity for households in poverty in San Francisco, CA (in poverty: 97.7%, CI: 96.7%-  
248 98.7%; not in poverty: 99.3%, CI:99.1%-99.5%); Dallas, TX (in poverty: 92.5%, CI: 90.5%-  
249 94.5%; not in poverty: 95.1%, CI: 94.7%-95.6%); Chicago, IL (in poverty: 92.8%, CI:91.2%-  
250 94.3%, not in poverty: 94.8%, CI: 94.3%-95.3%); and Tampa, FL (in poverty: 83.9%, CI: 81.2%-  
251 87.0%; not in poverty: 88.8%, CI: 88.1%-89.6%) (**Fig S 2**).  
252  
253 In summary, at the census division level, broad trends of sewer connectivity by racial group  
254 revealed higher connectivity for households with an Asian, Black or African American, Native  
255 Hawaiian and Other Pacific Islander, or Hispanic householder and lower connectivity for  
256 households with an American Indian and Alaska Native or White householder. Sewer  
257 connectivity decreased with age, was highest in households with one person, and higher for



258 households in poverty. These trends were similar when stratifying by urban, rural, central city,  
259 and MSA status, except that the broad racial disparities described above were only observed in  
260 urban and rural areas that are inside of an MSA but outside of a central city. Broad trends were  
261 also similar for individual large metropolitan areas, with some exceptions for households with a  
262 Hispanic householders and households in poverty in particular MSAs.

263

## 264 **Which geographic areas have low connectivity to sewers and** 265 **what are their demographics?**

266 Next, we sought to assess which geographic areas in the U.S. have low connectivity to sewer  
267 systems. These are areas where wastewater-based epidemiology may provide little direct  
268 information on disease dynamics. Additionally, we assessed correlations of sewer connectivity  
269 at the county or county subdivision level with demographic and economic factors. The  
270 compilation of the datasets and an assessment of data completeness are described in the S2  
271 Appendix, **Table 1**, and **Table S 3**.

272

273 Using data from the 2021 American Community Survey on the percentage of occupied housing  
274 units lacking complete plumbing facilities by county, we defined the lower bound on the  
275 percentage of the population not connected to sewers. In 14 counties,  $\geq 10\%$  of occupied  
276 housing units lacked complete plumbing facilities; of these counties, 12 were in Alaska and 2  
277 were in the Navajo Nation. In 5 counties,  $\geq 20\%$  of occupied housing units lacked complete  
278 plumbing facilities, all in Alaska. The Yukon-Koyukuk Census Area in Alaska, had the highest  
279 percentage of occupied housing units lacking complete plumbing facilities at 36% (**Fig S 3**,  
280 **Table S 1**).

281

282 The Florida Department of Health onsite sewage treatment and disposal systems inspection  
283 data (**Fig 4**) revealed that the percentage of households not on septic tanks (expected to  
284 correlate with the percentage of households connected to sewer) was higher in metropolitan  
285 compared to micropolitan county subdivisions and higher in micropolitan compared to rural  
286 county subdivisions, but the effect was not significant ( $p = 0.052$  and  $p = 0.37$ , respectively) (**Fig**  
287 **S 4a-b**). The percentage of households not on septic tanks was significantly lower in county  
288 subdivisions in the panhandle (74.0% vs 92.0%,  $p < 10^{-9}$ ) and in county subdivisions that did not  
289 border the coast (86.6% vs 95.7%,  $p < 10^{-9}$ ) (**Fig S 4**). By combining this dataset with the 2012  
290 American Community Survey (ACS) describing demographic and economic characteristics of  
291 county subdivisions, we found that county subdivisions with less septic usage (suggesting more  
292 sewer connectivity) were significantly more Hispanic, more Asian, and had a smaller household  
293 size (**Table 2** and **Fig S 5**), consistent with the nation-wide results from the AHS. These trends  
294 were driven by metropolitan county subdivisions (**Fig S 6**), and an additional trend in  
295 metropolitan county subdivisions not observed for all county subdivisions was that county  
296 subdivisions with less septic usage had a significantly lower percentage of American Indian and  
297 Alaska Natives. There were too few micropolitan and rural county subdivisions to observe  
298 significant trends (**Fig S 7** and **Fig S 8**).  
299

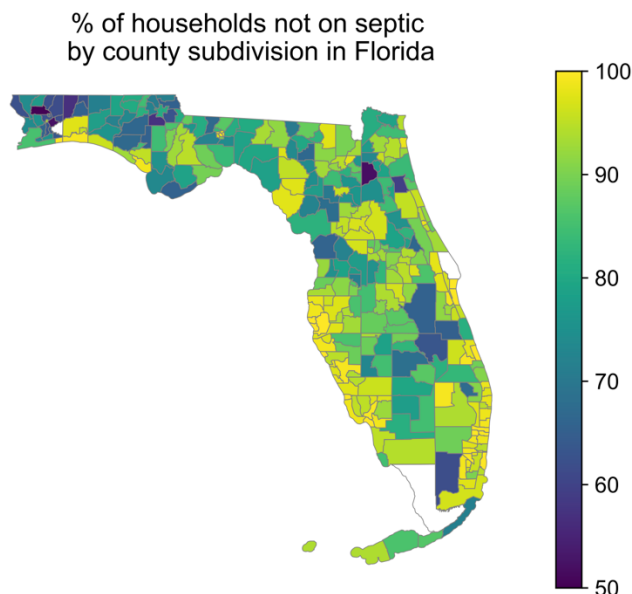

300

301 **Fig 4: Map of the percentage of households in each county subdivision of Florida *not***  
 302 **connected to septic tanks.** Data are from the Florida Department of Health septic tank  
 303 inspection data from June 2012. County subdivisions with fewer than 5 households or 20  
 304 population size are displayed in white.

305

306 **Table 2: Correlation of the percentage of a Florida county subdivision *not* connected to**  
 307 **septic tanks with different demographic or economic variables.**

| Demographic or economic variable                       | Correlation of variable with % of county subdivision <i>not</i> on septic (Pearson correlation coefficient) | Significance (q-value) |
|--------------------------------------------------------|-------------------------------------------------------------------------------------------------------------|------------------------|
| Percent one race and Asian                             | 0.31                                                                                                        | <b>3.2E-07</b>         |
| Percent Hispanic                                       | 0.21                                                                                                        | <b>1.7E-03</b>         |
| Average household size                                 | -0.19                                                                                                       | <b>9.1E-3</b>          |
| Percent one race and American Indian and Alaska native | -0.15                                                                                                       | 0.07                   |

|                                                                 |       |      |
|-----------------------------------------------------------------|-------|------|
| Median age                                                      | 0.12  | 0.36 |
| Percent one race and White                                      | -0.12 | 0.40 |
| Percent one race and Black or African American                  |       |      |
| American                                                        | 0.09  | 1.11 |
| Median income                                                   | 0.07  | 2.27 |
| Percent one race and some other race                            | 0.07  | 2.33 |
| Percent one race and Native Hawaiian and other Pacific Islander |       |      |
|                                                                 | -0.04 | 5.76 |
| Percent uninsured (health insurance)                            | -0.02 | 8.24 |

308 Correlations significant to 5% are shown in bold. Data are from the Florida Department of Health  
 309 septic tank inspection permits reported in 2012.

310

311 In the 8 states with robust data in the EPA Clean Watersheds Needs Survey, multiple  
 312 neighboring counties in Florida, Michigan, and Minnesota had less than 20% of residents  
 313 receiving sewage collection, whereas this was not the case in California, Florida, Iowa,  
 314 Maryland, New Jersey, and New York (**Fig S 9**). Across multiple states, sewer connectivity by  
 315 county was positively correlated with percent Asian and percent Black or African American and  
 316 negatively correlated with percent White (**Table 3**), consistent with the nationwide trends from  
 317 the AHS data. While counties more connected to sewers appeared to have a significantly lower  
 318 percent of American Indian and Alaskan Natives in California, this is affected by missing data  
 319 from Indian reservations. Age and percent without health insurance were negatively correlated  
 320 with sewer connectivity. Counties more connected to sewers had significantly higher income in  
 321 Minnesota, Florida, and California, in contrast to the national results from the AHS data.  
 322 Significant trends of sewer connectivity with demographic and economic factors were  
 323 predominantly driven by metropolitan counties (**Table S 2**).

324

325 **Table 3: Correlation of the percentage of households in a county connected to public**  
 326 **sewers with different demographic or economic factors by state.**

| Demographic or economic variable                       | Correlation of variable with % of households by county connected to public sewers (Pearson correlation coefficient) |       |         | Significance (q-value) |
|--------------------------------------------------------|---------------------------------------------------------------------------------------------------------------------|-------|---------|------------------------|
|                                                        | State                                                                                                               |       |         |                        |
| Median age                                             | MN                                                                                                                  | -0.43 | 2.9E-03 |                        |
|                                                        | MI                                                                                                                  | -0.41 | 1.1E-02 |                        |
| Median income                                          | MN                                                                                                                  | 0.44  | 1.7E-03 |                        |
|                                                        | FL                                                                                                                  | 0.48  | 3.4E-03 |                        |
|                                                        | CA                                                                                                                  | 0.49  | 7.2E-03 |                        |
| Percent one race and American Indian and Alaska Native | CA                                                                                                                  | -0.50 | 4.9E-03 |                        |
|                                                        | MN                                                                                                                  | 0.58  | 2.7E-07 |                        |
|                                                        | MI                                                                                                                  | 0.51  | 7.7E-05 |                        |
|                                                        | NY                                                                                                                  | 0.55  | 2.8E-04 |                        |
| Percent one race and Asian                             | CA                                                                                                                  | 0.56  | 3.9E-04 |                        |
|                                                        | FL                                                                                                                  | 0.53  | 4.2E-04 |                        |
| Percent one race and Black or African American         | MN                                                                                                                  | 0.62  | 1.2E-08 |                        |
|                                                        | MI                                                                                                                  | 0.59  | 4.6E-07 |                        |
|                                                        | NY                                                                                                                  | 0.55  | 3.0E-04 |                        |
| Percent one race and Black or African American         | IA                                                                                                                  | 0.38  | 7.7E-03 |                        |
|                                                        | CA                                                                                                                  | 0.46  | 2.1E-02 |                        |
|                                                        | MI                                                                                                                  | -0.57 | 1.4E-06 |                        |

|                           |    |       |         |
|---------------------------|----|-------|---------|
|                           | CA | -0.54 | 9.6E-04 |
| Percent one race and      | NY | -0.51 | 1.8E-03 |
| White                     | IA | -0.35 | 2.8E-02 |
| Percent uninsured (health |    |       |         |
| insurance)                | MI | -0.38 | 3.3E-02 |

327 Only correlations that are significant ( $q\text{-value} \leq 0.05$ ) are shown. Data are from the 2012 EPA  
328 Clean Watersheds Needs Survey.

329

330 Analysis of the Island Areas of Guam, the Northern Mariana Islands, the Virgin Islands, and  
331 American Samoa revealed lower levels of sewer connectivity than in the states, with  
332 considerable spatial variability in connectivity (see S2 Appendix).

333

## 334 **Factors influencing applicability of wastewater-based** 335 **epidemiology to communities lacking sewer connection**

336 The inequities in sewer connections among communities raise the question of the applicability  
337 of inferences drawn from wastewater data in one community to communities lacking sewer  
338 connections. To explore this question, we used a deterministic compartmental model of two  
339 interacting populations with tunable levels of interaction, each with susceptible-infected-  
340 recovered (SIR) dynamics, and with wastewater sampling in each population into a common  
341 sample (**Fig 5a**). We set population A to be entirely connected to sewers and population B to  
342 have a tunable level of sampling by wastewater.

343

344 A common application of wastewater data is to aid in determining when an outbreak has  
345 peaked, which can inform policy decisions on when to ease restrictions. We first asked how well  
346 the wastewater data could predict the time of peak infections in population B when it is

347 completely unconnected to sewer systems and thus the only sampling is from population A. We  
 348 found that when the two populations have similar sizes, the wastewater concentration peak and  
 349 the infection peak in population B was within one generation time except when the interactions  
 350 between the two population is weak (**Fig 5b**). The generation time is the average time between  
 351 an individual's infection and transmission, which in an SIR model is the same as the infectious  
 352 period. For example, in two populations with 5000 individuals each, a disease basic  
 353 reproduction number of 1.5, and infectious period of 5.6 days, the percentage of contacts that  
 354 occur across populations must drop below 4% before the peak in wastewater concentration  
 355 occurred more than one generation time apart from the peak in infections in the unconnected  
 356 population (**Fig 5c**).

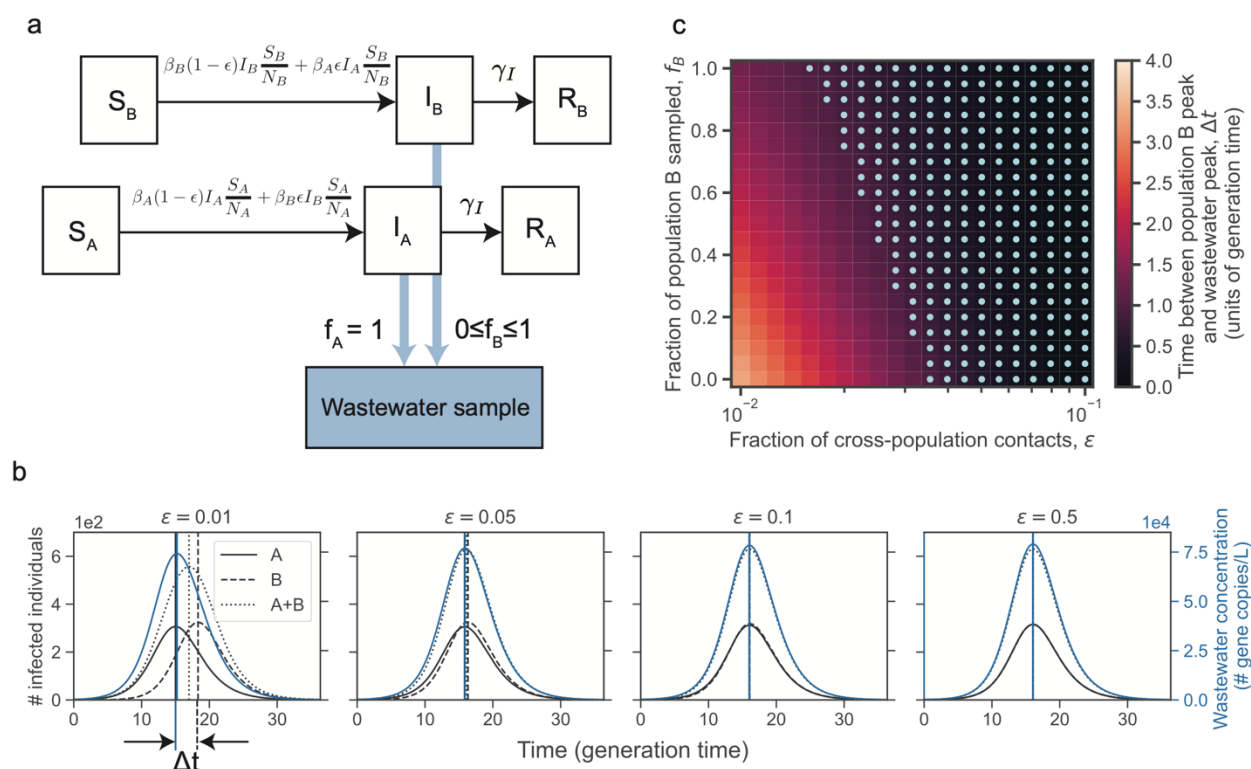

357  
 358 **Fig 5: Deterministic compartmental model of two interacting populations with**  
 359 **susceptible, infected, and recovered compartments and sampling by wastewater. (a)**  
 360 Schematic of model. Population A is entirely sampled by wastewater and a fraction of  
 361 population B,  $f_B$ , is sampled by wastewater. (b) Number of infected individuals (black curves) in

362 population A, population B, and population A and B combined and wastewater concentration  
363 (blue curves) over time for different interaction strengths or fractions of cross-population  
364 contacts ( $\epsilon$ ). The vertical lines indicate the peak time for the curves with matching line style and  
365 color. The time between the population B peak in infections and the wastewater concentration  
366 peak is indicated by  $\Delta t$ . (c) The time between the population B peak in infections and the  
367 wastewater concentration peak (defined in (b)) when varying the fraction of cross-population  
368 contacts ( $\epsilon$ ) and the fraction of population B that is sampled ( $f_B$ ). Light blue dots indicate  
369 parameter regimes in which  $\Delta t$  is less than 1 generation time. In both (b) and (c), the simulation  
370 starts with a single infected individual in population A at time 0 and no infected individuals in  
371 population B. The parameters are set to population size  $N_A = N_B = 5000$ , basic reproduction  
372 number  $R^A_0 = R^B_0 = R_0 = \frac{\beta_A}{\gamma_I} = \frac{\beta_B}{\gamma_I} = 1.5$ , rate of recovery  $\gamma_I = 0.18$ , and the overall contact rate times  
373 the probability of infection given contact  $\beta_A = \beta_B = \gamma_I R_0$ .

374  
375 We then weakened the assumption that population B had no contribution to the sampled  
376 wastewater and allowed a fraction of population B to be sampled by wastewater. For example,  
377 individuals in population B may commute to a workplace sampled by wastewater, or a fraction of  
378 population B may be connected at home. As the fraction of population B that is sampled by  
379 wastewater increases, the time between infection and wastewater peaks decreases; however,  
380 the fraction of B that is sampled has a much weaker effect on the wastewater peak time than  
381 the interaction parameter between the communities. For example, with the above parameters  
382 and equal population sizes, with 10% sampling of population B, the cross-population contacts  
383 must drop below 4%, and with 50% below 3% and with 100% below 2% before the wastewater  
384 concentration peak and the peak in the number of infections in population B drops below one  
385 generation time.

386



387 Varying the population size of both populations (with an equal population size between the two  
388 populations), the recovery rate or generation time, and the  $R_0$  of both populations (with an equal  
389  $R_0$  in the two populations) has only a weak effect on the discrepancy between wastewater  
390 concentration and population B infection peaks (**Fig S 10**).

391  
392 When the unconnected population has a smaller size than the connected population, then even  
393 substantial interactions between the two populations can lead the wastewater concentration to  
394 peak before the infections in the unconnected population peaks (**Fig S 10**). Both very weak and  
395 very strong interactions cause the wastewater peak to coincide with the peak number of  
396 infections in the unconnected population.

397  
398 Additionally, when the unconnected population has a smaller  $R_0$  than the connected population  
399 (which could occur for instance if the unconnected population was more spread out  
400 geographically and thus had a lower contact rate), the outbreak in population B peaks later than  
401 the wastewater peak leading to a discrepancy in the peak times (**Fig S 10**).

402

## 403 **Discussion**

404

### 405 **Equity of sewer connectivity**

406 Our analysis of available datasets revealed considerable variability in sewer connectivity within  
407 and between communities, across locations, demographics, and economic statuses in the  
408 United States. The western US had higher levels of sewer connectivity than the eastern US.  
409 Across the US, lower connectivity to sewers was observed for American Indian and Alaska  
410 Native householders; White householders; non-Hispanic householders; older populations; and  
411 larger households in most census divisions. In the Pacific census division, lower connectivity to

412 sewers was observed for Native Hawaiian and Other Pacific Islander householders specifically  
413 in areas inside of a metropolitan statistical area but outside of a central city. Across census  
414 divisions, households not in poverty were less connected to sewers, consistent with the  
415 observation that, nation-wide, higher income households were less connected to sewers [10].  
416 Aggregating by large metropolitan areas yielded similar trends as when aggregating by census  
417 divisions, except for lower connection for Hispanic householders in San Jose area and for  
418 households in poverty in San Francisco, Dallas, Chicago, and Tampa metropolitan areas,  
419 whereas these groups were better connected to sewers at the census division level. The  
420 differences in the MSA-level data suggested heterogeneity in connectivity across locations.

421

## 422 **Geographic variation in sewer connectivity**

423 Large parts of Alaska and the Navajo Nation lacked plumbing. This is consistent with the finding  
424 from the Annual Report to Congress on Sanitation Deficiency Levels for Indian Homes and  
425 Communities in 2019 that approximately 20% of Indian homes in Alaska do not have sewage  
426 disposal and about 10% of Indian homes in the Navajo Nation do not have sewage disposal  
427 [33].

428

429 State-level datasets revealed that sewer connectivity varied between and within communities.  
430 While in some states most areas had sewer connectivity (California, Iowa, Maryland, New  
431 Jersey, New York), in others there were large regions that lacked connectivity (Minnesota,  
432 Michigan, Florida). Asian and Hispanic populations were less connected to septic tanks across  
433 county subdivisions in Florida; however, there was considerable variability across the state and  
434 potential biases in the data. In contrast to the national data, in Minnesota, Florida, and  
435 California, counties with lower median household incomes were less connected to sewers,  
436 suggesting variability across the nation. This result in Florida is consistent with the observation

437 that as income levels rose, household decentralized system usage declined in Florida [14].  
438 However, we did not observe any significant correlation of income with septic usage in the  
439 Florida Department of Health onsite sewage treatment and disposal systems inspection  
440 permitting dataset, possibly due to not all septic tanks having a permit that is reported in this  
441 dataset.

442  
443 While these correlations may be largely driven by differences between urban and rural areas  
444 within a county or county subdivision, they may still be very useful in assessing inequities in  
445 sewer connectivity in large catchments that span neighboring counties or county subdivisions.

446

## 447 **Data limitations**

448 Substantial data gaps and biases prevented a comprehensive analysis of disparities in sewer  
449 system connectivity within and between communities across the US, particularly for small  
450 communities, tribal lands and Alaska Native Villages, and state and local geographic scales.  
451 The current design of the American Housing Survey has too small of sample size to study state  
452 and local geographic scales [30]. Additionally, the AHS may have underestimated the fraction of  
453 households using septic systems due to its survey design (**Table 1**). The differences between  
454 Florida state data supports the need for detailed and reproducible longitudinal studies of sewer  
455 connectivity (both in developing sampling and analysis methods).

456

457 Public health officials may find it beneficial to conduct local equity studies of sewer connectivity.  
458 Data on the catchment area sizes of the wastewater treatment plants would allow a better  
459 understanding of the geographic extent of the sampled population and the level of geographic  
460 aggregation needed to study sewer connectivity inequities. A recent study mapping wastewater  
461 treatment plant catchment areas and their population sizes served in New York state provides a

462 template for how to create these sewer catchment maps from a combination of permitting,  
463 survey, and tax record data [13]. If possible, it would be helpful to consolidate and standardize  
464 existing data where it exists (for instance, sewage disposal permitting at the local or state  
465 levels). Additionally, if the EPA's request to expand the question on the ACS about access to  
466 plumbing facilities to additionally ask about the type of plumbing facility [14,34] is granted, then  
467 this would be a valuable dataset with the geographic and temporal resolution to study equity in  
468 sewer connectivity moving forward.

469

## 470 **Generalizability of wastewater-based epidemiology data in** 471 **light of heterogeneities in sewer connectivity**

472 Our modeling results suggest that even weak interactions between two communities allow  
473 wastewater monitoring in one community to serve as reliable proxy for the time of maximum  
474 infections in the other community when the population sizes and  $R_0$  of the two populations are  
475 comparable, but not when the unconnected population has a substantially lower population size  
476 or  $R_0$ . In the scenario with unequal population size, outbreaks that are seeded at the same time  
477 in the two populations in the absence of interactions peak earlier in the unconnected population  
478 due to its smaller size. With weak interactions, seeding of infections from population A to B  
479 occurs slower, leading to more coincidence in peaks; with strong interactions, then the  
480 dynamics of B are dominated by those in A, leading to more coincidence in peaks; at  
481 intermediate interaction strengths, infections are seeded earlier and peaks early, leading to the  
482 largest discrepancy in wastewater and infection peaks.

483

484 As the purpose of our model was to explore the impact of factors on the generalizability of  
485 wastewater rather than to accurately capture the dynamics in all scenarios, we made simplifying  
486 assumptions, including that all infected individuals shed the same amount of pathogen genetic

487 material into wastewater and shed only during the infected period; that all individuals contribute  
488 equally to wastewater; and that pathogen detection in wastewater has perfect sensitivity.

489  
490 Our results suggest that in assessing the generalizability of wastewater data, it would be useful  
491 to estimate the extent of mobility between connected and unconnected communities.  
492 Interestingly, Ref [35] found no correlation between the size of a catchment area and the  
493 correlation of wastewater with case data for SARS-CoV-2, consistent with the result that  
494 interactions between connected and unconnected communities cause the disease dynamics to  
495 look similar to the wastewater data. In regions without sewer connectivity or with little interaction  
496 between connected and unconnected communities, wastewater data from neighboring  
497 communities will be less informative. In areas with low sewer connectivity in households,  
498 sampling wastewater outflow at frequently visited non-household locations (i.e., schools, offices,  
499 malls, etc.) may capture a more representative population.

500

## 501 **Additional considerations for equity in WBE**

502 In addition to inequities in sewer connectivity, the sewer locations used for wastewater sampling  
503 should be considered to promote demographic equity and ensuring the ability to capture  
504 spatiotemporal trends [36,37]. While we have focused on analysis on the US due to data  
505 availability, internationally disadvantaged populations are associated with lower access to  
506 sewers [38]. The ongoing development of wastewater sampling in non-sewered settings [39], for  
507 example in water channels in Las Vegas Valley [40], onsite sanitation facilities in Bangladesh, a  
508 refugee camp in Lebanon [41], and various non-sewered settings in low and middle income  
509 countries [42], represents a critical area for research and development.

510

## 511 **Conclusions**

512 In summary, while wastewater-based epidemiology is a useful tool to monitor disease burden  
513 and dynamics, our analyses suggest that access to this new tool varies across the US. More  
514 comprehensive data on sewer connectivity is needed, and in combination with assessments of  
515 mobility and population parameters, these data can help with the design of wastewater sampling  
516 schemes and the interpretation for epidemic trends in sampled and neighboring unsampled  
517 communities.

518

## 519 **Acknowledgements**

520 We thank Cara Omana from the Minnesota Pollution Control Agency for generously sharing the  
521 Minnesota WINS data and Harry Campbell from the Utah Department of Environment Quality,  
522 Division of Water Quality for generously sharing the Utah MWPP survey data and to both for  
523 answering questions about the datasets. We thank colleagues in the Grad lab and the Harvard  
524 T. H. Chan School of Public Health Center for Communicable Disease Dynamics for helpful  
525 discussions, particularly Stephen Kissler.

## 526 **References**

- 527 1. Peccia J, Zulli A, Brackney DE, Grubaugh ND, Kaplan EH, Casanovas-Massana A, et al.  
528 Measurement of SARS-CoV-2 RNA in wastewater tracks community infection dynamics.  
529 Nat Biotechnol. 2020;38: 1164–1167.
- 530 2. Medema G, Been F, Heijnen L, Petterson S. Implementation of environmental surveillance  
531 for SARS-CoV-2 virus to support public health decisions: Opportunities and challenges.  
532 Curr Opin Environ Sci Health. 2020;17: 49–71.
- 533 3. Pöyry T, Stenvik M, Hovi T. Viruses in sewage waters during and after a poliomyelitis  
534 outbreak and subsequent nationwide oral poliovirus vaccination campaign in Finland. Appl  
535 Environ Microbiol. 1988;54: 371–374.
- 536 4. Link-Gelles R, Lutterloh E, Schnabel Ruppert P, Backenson PB, St George K, Rosenberg  
537 ES, et al. Public Health Response to a Case of Paralytic Poliomyelitis in an Unvaccinated  
538 Person and Detection of Poliovirus in Wastewater - New York, June-August 2022. MMWR  
539 Morb Mortal Wkly Rep. 2022;71: 1065–1068.
- 540 5. Kilaru P, Hill D, Anderson K, Collins MB, Green H, Kmush BL, et al. Wastewater  
541 Surveillance for Infectious Disease: A Systematic Review. Am J Epidemiol. 2023;192: 305–  
542 322.
- 543 6. Boehm AB, Hughes B, Duong D, Chan-Herur V, Buchman A, Wolfe MK, et al. Wastewater  
544 concentrations of human influenza, metapneumovirus, parainfluenza, respiratory syncytial  
545 virus, rhinovirus, and seasonal coronavirus nucleic-acids during the COVID-19 pandemic: a  
546 surveillance study. Lancet Microbe. 2023. doi:10.1016/S2666-5247(22)00386-X
- 547 7. Baz-Lomba JA, Salvatore S, Gracia-Lor E, Bade R, Castiglioni S, Castrignanò E, et al.  
548 Comparison of pharmaceutical, illicit drug, alcohol, nicotine and caffeine levels in  
549 wastewater with sale, seizure and consumption data for 8 European cities. BMC Public  
550 Health. 2016;16: 1035.

- 551 8. Gushgari AJ, Venkatesan AK, Chen J, Steele JC, Halden RU. Long-term tracking of opioid  
552 consumption in two United States cities using wastewater-based epidemiology approach.  
553 Water Res. 2019;161: 171–180.
- 554 9. Analytics B. Wastewater for equitable Covid-19 monitoring. In: Medium [Internet]. 8 Jul  
555 2021 [cited 9 Feb 2023]. Available: [https://biobotanalytics.medium.com/wastewater-for-](https://biobotanalytics.medium.com/wastewater-for-equitable-covid-19-monitoring-e3b947d91e0a)  
556 [equitable-covid-19-monitoring-e3b947d91e0a](https://biobotanalytics.medium.com/wastewater-for-equitable-covid-19-monitoring-e3b947d91e0a)
- 557 10. Olesen SW, Young CCW, Duvallet C. White paper: The effect of septic systems on  
558 wastewater-based epidemiology. 2022. doi:10.5281/zenodo.7130726
- 559 11. U.S. Census Bureau. AHS 2021 National Public Use File. Available:  
560 [https://www2.census.gov/programs-](https://www2.census.gov/programs-surveys/ahs/2021/AHS%202021%20National%20PUF%20v1.0%20CSV.zip)  
561 [surveys/ahs/2021/AHS%202021%20National%20PUF%20v1.0%20CSV.zip](https://www2.census.gov/programs-surveys/ahs/2021/AHS%202021%20National%20PUF%20v1.0%20CSV.zip)
- 562 12. US EPA Decentralized Wastewater Program}. Septic Systems Fact Sheet. 2008 Oct.
- 563 13. Hill DT, Larsen DA. Using geographic information systems to link population estimates to  
564 wastewater surveillance data in New York State, USA. PLOS Glob Public Health. 2023;3:  
565 e0001062.
- 566 14. U.S. Environmental Protection Agency, Office of Water. Report to Congress on The  
567 Prevalence Throughout the U.S. of Low- and Moderate-Income Households Without  
568 Access to a Treatment Works and The Use by States of Assistance under Section  
569 603(c)(12) of the Federal Water Pollution Control Act. U.S. Environmental Protection  
570 Agency; 2021 Jul. Available: [https://www.epa.gov/system/files/documents/2022-01/low-](https://www.epa.gov/system/files/documents/2022-01/low-mod-income-without-treatment_report-to-congress.pdf)  
571 [mod-income-without-treatment\\_report-to-congress.pdf](https://www.epa.gov/system/files/documents/2022-01/low-mod-income-without-treatment_report-to-congress.pdf)
- 572 15. U.S. Census Bureau. AHS 2019 National Public Use File. Available:  
573 [https://www2.census.gov/programs-](https://www2.census.gov/programs-surveys/ahs/2019/AHS%202019%20National%20PUF%20v1.1%20CSV.zip)  
574 [surveys/ahs/2019/AHS%202019%20National%20PUF%20v1.1%20CSV.zip](https://www2.census.gov/programs-surveys/ahs/2019/AHS%202019%20National%20PUF%20v1.1%20CSV.zip)



- 575 16. U.S. Census Bureau. AHS 2019 Metropolitan Public Use File. Available:  
576 [https://www2.census.gov/programs-](https://www2.census.gov/programs-surveys/ahs/2019/AHS%202019%20Metropolitan%20PUF%20v1.0%20CSV.zip)  
577 [surveys/ahs/2019/AHS%202019%20Metropolitan%20PUF%20v1.0%20CSV.zip](https://www2.census.gov/programs-surveys/ahs/2019/AHS%202019%20Metropolitan%20PUF%20v1.0%20CSV.zip)
- 578 17. U.S. Census Bureau, Department of Commerce Department of Housing and Urban  
579 Development. 2019 AHS Integrated National Sample: Sample Design, Weighting, and Error  
580 Estimation. U.S. Census Bureau, Department of Commerce Department of Housing and  
581 Urban Development; 2020 Sep. Available: [https://www2.census.gov/programs-](https://www2.census.gov/programs-surveys/ahs/2019/2019%20AHS%20National%20Sample%20Design,%20Weighting,%20and%20Error%20Estimation.pdf)  
582 [surveys/ahs/2019/2019%20AHS%20National%20Sample%20Design,%20Weighting,%20a](https://www2.census.gov/programs-surveys/ahs/2019/2019%20AHS%20National%20Sample%20Design,%20Weighting,%20and%20Error%20Estimation.pdf)  
583 [nd%20Error%20Estimation.pdf](https://www2.census.gov/programs-surveys/ahs/2019/2019%20AHS%20National%20Sample%20Design,%20Weighting,%20and%20Error%20Estimation.pdf)
- 584 18. U.S. Census Bureau, Department of Commerce Department of Housing and Urban  
585 Development. 2019 AHS Metropolitan Sample: Sample Design, Weighting, and Error  
586 Estimation. U.S. Census Bureau, Department of Commerce Department of Housing and  
587 Urban Development; 2020 Sep. Available: [https://www2.census.gov/programs-](https://www2.census.gov/programs-surveys/ahs/2019/2019%20AHS%20Metropolitan%20Sample%20Design,%20Weighting,%20and%20Error%20Estimation.pdf)  
588 [surveys/ahs/2019/2019%20AHS%20Metropolitan%20Sample%20Design,%20Weighting,%](https://www2.census.gov/programs-surveys/ahs/2019/2019%20AHS%20Metropolitan%20Sample%20Design,%20Weighting,%20and%20Error%20Estimation.pdf)  
589 [20and%20Error%20Estimation.pdf](https://www2.census.gov/programs-surveys/ahs/2019/2019%20AHS%20Metropolitan%20Sample%20Design,%20Weighting,%20and%20Error%20Estimation.pdf)
- 590 19. U.S. Census Bureau, Department of Commerce Department of Housing and Urban  
591 Development. 2021 AHS Integrated National Sample: Sample Design, Weighting, and Error  
592 Estimation. U.S. Census Bureau, Department of Commerce Department of Housing and  
593 Urban Development; 2022 Aug. Available: [https://www2.census.gov/programs-](https://www2.census.gov/programs-surveys/ahs/2021/2021%20AHS%20National%20Sample%20Design,%20Weighting,%20and%20Error%20Estimation.pdf)  
594 [surveys/ahs/2021/2021%20AHS%20National%20Sample%20Design,%20Weighting,%20a](https://www2.census.gov/programs-surveys/ahs/2021/2021%20AHS%20National%20Sample%20Design,%20Weighting,%20and%20Error%20Estimation.pdf)  
595 [nd%20Error%20Estimation.pdf](https://www2.census.gov/programs-surveys/ahs/2021/2021%20AHS%20National%20Sample%20Design,%20Weighting,%20and%20Error%20Estimation.pdf)
- 596 20. US Census Bureau. American Community Survey Information Guide. [cited 5 Jan 2023].  
597 Available: <https://www.census.gov/programs-surveys/acs/library/information-guide.html>
- 598 21. General Facts and Statistics about Wastewater in Florida. [cited 10 Feb 2023]. Available:  
599 [https://floridadep.gov/water/domestic-wastewater/content/general-facts-and-statistics-](https://floridadep.gov/water/domestic-wastewater/content/general-facts-and-statistics-about-wastewater-florida)  
600 [about-wastewater-florida](https://floridadep.gov/water/domestic-wastewater/content/general-facts-and-statistics-about-wastewater-florida)

- 601 22. Florida Department of Health. Onsite Sewage Locations in Florida - 2012. Available:  
602 [https://fgdl.org/zips/metadata/xml/septic\\_jun12.xml](https://fgdl.org/zips/metadata/xml/septic_jun12.xml)
- 603 23. Environmental Protection Agency. Clean Watersheds Needs Survey Detailed Scope and  
604 Methods. Environmental Protection Agency; 2012. Available:  
605 [https://www.epa.gov/sites/default/files/2015-](https://www.epa.gov/sites/default/files/2015-10/documents/cwns_2012_detailed_scope_and_methods-508.pdf)  
606 [10/documents/cwns\\_2012\\_detailed\\_scope\\_and\\_methods-508.pdf](https://www.epa.gov/sites/default/files/2015-10/documents/cwns_2012_detailed_scope_and_methods-508.pdf)
- 607 24. Agency USEP. Clean watersheds needs survey 2012 report to congress. US  
608 Environmental Protection Agency; 2016.
- 609 25. U.S. Census Bureau. Guidance on Using 2020 Island Areas Censuses Data. 20 Oct 2022  
610 [cited 31 Mar 2023]. Available: [https://www2.census.gov/programs-](https://www2.census.gov/programs-surveys/decennial/2020/technical-documentation/island-areas-tech-docs/2020-iac-guidance.pdf)  
611 [surveys/decennial/2020/technical-documentation/island-areas-tech-](https://www2.census.gov/programs-surveys/decennial/2020/technical-documentation/island-areas-tech-docs/2020-iac-guidance.pdf)  
612 [docs/2020-iac-](https://www2.census.gov/programs-surveys/decennial/2020/technical-documentation/island-areas-tech-docs/2020-iac-guidance.pdf)  
613 [guidance.pdf](https://www2.census.gov/programs-surveys/decennial/2020/technical-documentation/island-areas-tech-docs/2020-iac-guidance.pdf)
- 614 26. U.S. Census Bureau. 2020 Island Areas Censuses (IAC) Demographic Profile Summary  
615 File. U.S. Census Bureau; 2022 Oct. Available: [https://www2.census.gov/programs-](https://www2.census.gov/programs-surveys/decennial/2020/technical-documentation/island-areas-tech-docs/demographic_profile/2020-iac-dpsf-technical-documentation.pdf)  
616 [surveys/decennial/2020/technical-documentation/island-areas-tech-](https://www2.census.gov/programs-surveys/decennial/2020/technical-documentation/island-areas-tech-docs/demographic_profile/2020-iac-dpsf-technical-documentation.pdf)  
617 [docs/demographic\\_profile/2020-iac-dpsf-technical-documentation.pdf](https://www2.census.gov/programs-surveys/decennial/2020/technical-documentation/island-areas-tech-docs/demographic_profile/2020-iac-dpsf-technical-documentation.pdf)
- 618 27. U.S. Department of Housing and Urban Development and U.S. Census Bureau. 2013 AHS  
619 Definitions. In: 2013 AHS Definitions [Internet]. [cited 9 Feb 2023]. Available:  
620 <https://www2.census.gov/programs-surveys/ahs/2013/2013%20AHS%20Definitions.pdf>
- 621 28. TIGER/Line® Shapefiles. [cited 25 Apr 2023]. Available: [https://www.census.gov/cgi-](https://www.census.gov/cgi-bin/geo/shapefiles/index.php)  
622 [bin/geo/shapefiles/index.php](https://www.census.gov/cgi-bin/geo/shapefiles/index.php)
- 623 29. U.S. Census Bureau. Metropolitan and Micropolitan About. In: Metropolitan and  
624 Micropolitan About [Internet]. 22 Nov 2021 [cited 9 Feb 2023]. Available:  
625 <https://www.census.gov/programs-surveys/metro-micro/about.html>
- 626 30. Schwartz MB. 2007 American Community Survey: A Comparison to Selected Housing and  
627 Financial Characteristics for the United States from the 2007 American Housing Survey.

- 627 Housing and Household Economic Statistics Division U.S. Census Bureau; Available:  
628 <https://www.huduser.gov/portal/datasets/ahs/acs-ahscomparisonreport.pdf>
- 629 31. U.S. Department of Housing and Urban Development and U.S. Census Bureau. 2021 AHS  
630 Definitions. In: 2021 AHS Definitions [Internet]. [cited 22 May 2023]. Available:  
631 <https://www2.census.gov/programs-surveys/ahs/2021/2021%20AHS%20Definitions.pdf>
- 632 32. U.S. Census Bureau. AHS 2013 National Public Use File. Available:  
633 [https://www2.census.gov/programs-](https://www2.census.gov/programs-surveys/ahs/2013/AHS%202013%20National%20PUF%20v2.0%20CSV.zip)  
634 [surveys/ahs/2013/AHS%202013%20National%20PUF%20v2.0%20CSV.zip](https://www2.census.gov/programs-surveys/ahs/2013/AHS%202013%20National%20PUF%20v2.0%20CSV.zip)
- 635 33. Indian Health Service; Office of Environmental Health and Engineering; Division of  
636 Sanitation Facilities Construction. Annual Report To the Congress of the United States On  
637 Sanitation Deficiency Levels for Indian Homes and Communities: Fiscal Year 2019.  
638 Rockville (MD): Indian Health Service (US); 2020.
- 639 34. Environmental Protection Agency. EPA's Proposal: Justification for Requested Revision,  
640 Addition or Deletion to Questions on the American Community Survey (ACS). 2018.  
641 Available:  
642 [https://foiaonline.gov/foiaonline/action/public/submissionDetails?trackingNumber=EPA-HQ-](https://foiaonline.gov/foiaonline/action/public/submissionDetails?trackingNumber=EPA-HQ-2018-010667&type=request)  
643 [2018-010667&type=request](https://foiaonline.gov/foiaonline/action/public/submissionDetails?trackingNumber=EPA-HQ-2018-010667&type=request)
- 644 35. Duvallet C, Wu F, McElroy KA, Imakaev M, Endo N, Xiao A, et al. Nationwide Trends in  
645 COVID-19 Cases and SARS-CoV-2 RNA Wastewater Concentrations in the United States.  
646 ACS EST Water. 2022. doi:10.1021/acsestwater.1c00434
- 647 36. Medina CY, Kadonsky KF, Roman FA Jr, Tariqi AQ, Sinclair RG, D'Aoust PM, et al. The  
648 need of an environmental justice approach for wastewater based epidemiology for rural and  
649 disadvantaged communities: A review in California. Curr Opin Environ Sci Health. 2022;27:  
650 100348.

- 651 37. Haak L, Delic B, Li L, Guarin T, Mazurowski L, Dastjerdi NG, et al. Spatial and temporal  
652 variability and data bias in wastewater surveillance of SARS-CoV-2 in a sewer system. *Sci*  
653 *Total Environ.* 2022;805: 150390.
- 654 38. Adhikari S, Halden RU. Opportunities and limits of wastewater-based epidemiology for  
655 tracking global health and attainment of UN sustainable development goals. *Environ Int.*  
656 2022;163: 107217.
- 657 39. Jakariya M, Ahmed F, Islam MA, Al Marzan A, Hasan MN, Hossain M, et al. Wastewater-  
658 based epidemiological surveillance to monitor the prevalence of SARS-CoV-2 in developing  
659 countries with onsite sanitation facilities. *Environ Pollut.* 2022;311: 119679.
- 660 40. Gerrity D, Papp K, Dickenson E, Ejjada M, Marti E, Quinones O, et al. Characterizing the  
661 chemical and microbial fingerprint of unsheltered homelessness in an urban watershed. *Sci*  
662 *Total Environ.* 2022;840: 156714.
- 663 41. Tokajian S, Moghnieh R, Salloum T, Arabaghian H, Alousi S, Moussa J, et al. Extended-  
664 spectrum  $\beta$ -lactamase-producing *Escherichia coli* in wastewaters and refugee camp in  
665 Lebanon. *Future Microbiol.* 2018;13: 81–95.
- 666 42. Gwenzi W. Wastewater, waste, and water-based epidemiology (WWW-BE): A novel  
667 hypothesis and decision-support tool to unravel COVID-19 in low-income settings? *Sci*  
668 *Total Environ.* 2022;806: 150680.
- 669 43. U.S. Department of Housing and Urban Development and U.S. Census Bureau. Appendix  
670 B: Sample Design and Weighting: 2013. U.S. Department of Housing and Urban  
671 Development and U.S. Census Bureau; 2013. Available:  
672 [https://www2.census.gov/programs-](https://www2.census.gov/programs-surveys/ahs/2013/2013%20AHS%20National%20Sample%20Design%20and%20Weighting.pdf)  
673 [surveys/ahs/2013/2013%20AHS%20National%20Sample%20Design%20and%20Weightin](https://www2.census.gov/programs-surveys/ahs/2013/2013%20AHS%20National%20Sample%20Design%20and%20Weighting.pdf)  
674 [g.pdf](https://www2.census.gov/programs-surveys/ahs/2013/2013%20AHS%20National%20Sample%20Design%20and%20Weighting.pdf)
- 675 44. Onsite Sewage FAQ - Permitting. [cited 10 Feb 2023]. Available:  
676 <https://floridadep.gov/water/onsite-sewage/content/onsite-sewage-faq-permitting>

- 677 45. Florida Department of Health. Septic System Owner's Guide. In: floridahealth.gov [Internet].  
678 [cited 10 Feb 2023]. Available: [https://www.floridahealth.gov/environmental-health/onsite-](https://www.floridahealth.gov/environmental-health/onsite-sewage/_documents/septic-folder-8x11-link2.pdf)  
679 [sewage/\\_documents/septic-folder-8x11-link2.pdf](https://www.floridahealth.gov/environmental-health/onsite-sewage/_documents/septic-folder-8x11-link2.pdf)
- 680 46. Utah Department of Environmental Quality Water Quality. Municipal Wastewater Planning  
681 Program (MWPP). In: Municipal Wastewater Planning Program (MWPP) [Internet]. 3 Feb  
682 2023 [cited 10 Feb 2023]. Available: [https://deq.utah.gov/water-quality/municipal-](https://deq.utah.gov/water-quality/municipal-wastewater-planning-program-mwpp)  
683 [wastewater-planning-program-mwpp](https://deq.utah.gov/water-quality/municipal-wastewater-planning-program-mwpp)
- 684 47. Campbell H. 2021 MWPP Survey. In: 2021 MWPP Survey [Internet]. 27 Oct 2021 [cited 10  
685 Feb 2023]. Available: [https://documents.deq.utah.gov/water-quality/engineering/municipal-](https://documents.deq.utah.gov/water-quality/engineering/municipal-wastewater-planning-program/DWQ-2021-026722.pdf)  
686 [wastewater-planning-program/DWQ-2021-026722.pdf](https://documents.deq.utah.gov/water-quality/engineering/municipal-wastewater-planning-program/DWQ-2021-026722.pdf)
- 687 48. Minnesota Pollution Control Agency. 2021 Wastewater Infrastructure Needs Instructions  
688 and Frequently Asked Questions (FAQ). Apr 2021 [cited 31 Mar 2023]. Available:  
689 <https://www.pca.state.mn.us/sites/default/files/wq-wwtp3-06.pdf>
- 690 49. Robinson C. 2017 SSTS Annual Report Subsurface Sewage Treatment Systems in  
691 Minnesota. Minnesota Pollution Control Agency; 2018 Apr. Available:  
692 <https://www.pca.state.mn.us/sites/default/files/wq-wwists1-58.pdf>
- 693 50. U.S. Environmental Protection Agency. 2012 Clean Watersheds Needs Survey. Available:  
694 <https://ordspub.epa.gov/ords/cwns2012/f?p=cwns2012:25>
- 695 51. Weidhaas J, Aanderud ZT, Roper DK, VanDerslice J, Gaddis EB, Ostermiller J, et al.  
696 Correlation of SARS-CoV-2 RNA in wastewater with COVID-19 disease burden in  
697 sewersheds. *Sci Total Environ.* 2021;775: 145790.
- 698 52. U.s E. WaterSense Statistics and Facts. 11 May 2022 [cited 3 Apr 2023]. Available:  
699 <https://www.epa.gov/watersense/statistics-and-facts>

700

## 701 **Supporting information**

### 702 **S1 Appendix. Supplementary method**

703 **S2 Appendix. Supplementary analyses.** Compilation of data, assessment of data  
704 completeness, sewer connectivity in U.S. Island Areas, supplementary figures, and  
705 supplementary tables.

## 706 **S1 Appendix. Supplementary methods.**

### 707 **Dataset descriptions and data cleaning**

#### 708 **U.S. Census Bureau American Housing Survey 2019 and 2021**

709 The American Housing Survey (AHS) National and Metropolitan Public Use Files were  
710 downloaded from Ref. [11,15,16]. The sample design, weighting, and error estimation survey is  
711 described in Refs. [17–19]. Briefly, the AHS is a biannual survey that assesses housing  
712 characteristics. Two samples of households are chosen every survey cycle, the Integrated  
713 National Sample and the Independent Metropolitan Sample. The Integrated National Sample  
714 consists of nationally representative households and includes an oversample of each of 15  
715 largest metropolitan areas. The Independent Metropolitan Sample consists of representative  
716 households in 20 large metropolitan areas that are representative of the next largest 50  
717 metropolitan areas. Ten of the 20 large metropolitan areas are sampled every other survey  
718 cycle (10 metropolitan areas surveyed every 2 years). The Integrated National Sample in 2019  
719 included 86,257 selected representative housing units, of which about 63,500 met the AHS  
720 definition of a housing unit and were able to be interviewed, and in 2021 included 95,295  
721 selected representative housing units, of which about 64,100 were interviewed. The Integrated  
722 Metropolitan Samples in 2019 and 2021 included around 3000 selected representative housing  
723 units in each metropolitan area, of which around 1000-3000 were eligible and were able to be  
724 interviewed (same criteria as in the Integrated National Sample).

725

726 Geographic data of each household available in the Public Use File included the census  
727 division; core based statistical area (CBSA) for the 15 largest metropolitan areas and the 20  
728 large metropolitan areas in the metropolitan data. All other households are classified as in “all  
729 other metropolitan areas” or “not in a metropolitan area” (all other locations).

730

731 The race, ethnicity, and age of the householder (the person or one of the persons who is an  
732 owner or renter of the unit) was used to categorize the race, ethnicity, and age of the household.  
733 Due to the low numbers of households where the householder responded as having more than  
734 one race, we focused on households where householders identified as having a single race.

735

### 736 **U.S. Census Bureau American Housing Survey National Sample 2013**

737 The American Housing Survey National (2013) Use File was downloaded from Ref. [32]. The  
738 sample design, weighting, and error estimation survey is described in Ref [43]. The National  
739 Sample included 84,400 selected housing units representative nationally and including a  
740 supplemental sample of 15,553 housing units in the Chicago, Detroit, New York City, Northern  
741 New Jersey, and Philadelphia metropolitan statistical areas, of which about 71,600 met the  
742 definition of a housing unit and were able to be interviewed.

743

744 Geographic data of each household available in the Public Use File included the census  
745 division; census region; central city, urban, or rural status; and select metropolitan area codes.  
746 All other housing units are classified into “not in a metropolitan area” or had their code  
747 suppressed for confidentiality [27].

748

749 **Florida Department of Health onsite sewage treatment and disposal**  
750 **system inspections**

751 The locations of onsite sewage treatment and disposal systems inspected by Florida  
752 Department of Health reported June 2012 was downloaded from Ref. [22]. As of 2022, an  
753 inspection permit is required for construction [44] and inspection is recommended every 3 to 5  
754 years after [45]. The number of systems inspected that are active at the latest inspection (after  
755 removing repeat inspections) is 601,430. The years of inspection are primarily 1998-2011, with  
756 some outliers as early as 1900, which may be old septic systems or typos, and as late as 2200,  
757 which are likely typos.

758

759 **Utah Municipal Wastewater Planning Program (MWPP) Survey 2021**

760 Data from the Utah Municipal Wastewater Planning Survey was provided by the Utah  
761 Department of Environment Quality, Division of Water Quality. The dataset includes an estimate  
762 of the population receiving collection by each utility that owns or operates a sanitary sewerage  
763 system and its latitude and longitude. The data gathered from treatment plant operators and  
764 participation is reported as mandatory [46], although only 71% of contacts responded [47]. We  
765 filtered the data to include any facility that has collection (this included collection only, treatment  
766 and collection, or small lagoons which are often collection and treatment). Manual correction of  
767 facility longitude and latitude is described in the supplementary methods.

768

769 Manual editing of facility longitude and latitude was done for 5 facilities' that did not fall within  
770 the state of Utah when combining with the 2021 TIGER shapefile (BRIAN HEAD TOWN,  
771 CANYONG LAND IMPROVEMENT DISTRICT, HILL AFB (AMERICAN WATER),  
772 JORDANELLE SSD, PLAIN CITY) and 1 facility that did not report a latitude and longitude  
773 (PANGUITCH LAKE S. S. D.). For these facilities, the latitude and longitude were manually



774 edited to be that of the location found in a Google Maps search of the facility name. If the  
775 Google Maps search found a city, then an arbitrarily chosen location in that city was used to  
776 obtain a latitude and longitude.

777

## 778 **Minnesota Wastewater Infrastructure Needs Survey (WINS) 2021**

779 Data for the Minnesota Wastewater Infrastructure Needs Survey [48] was provided by the  
780 Minnesota Pollution Control Agency. Communities (places and townships) responded to the  
781 question “Does your community have a collection system?” with “yes”, “no”, or no response. The  
782 survey did not receive a response from every community in Minnesota.

783

784 The Census Designated Place (CDP) name was obtained from the reported community name  
785 with manual changes reported in **Table S 2**.

786

## 787 **Minnesota Subsurface Sewage Treatment Systems 2017**

788 The Minnesota Subsurface Sewage Treatment Systems (SSTS) dataset reported the number of  
789 SSTS by local government units with a known SSTS program. Data was taken from Ref. [49].  
790 Two hundred and eleven out of 2018 known SSTS programs submitted an annual report. Not all  
791 SSTS programs were able to be identified and contacts were not always provided. Fourteen  
792 reported having zero SSTS within their jurisdiction despite permitting SSTS in 2017. Data were  
793 reported to sometimes be estimates.

794

## 795 **U.S. Environmental Protection Agency Clean Watersheds Needs** 796 **Survey 2012**

797 Data for the most recent Environmental Protection Agency (EPA) Clean Watersheds Needs  
798 Survey (CWNS) survey (2012) [24] was downloaded from [50] and extracted from a Microsoft

799 Access database file to csv files using the mdbtools package  
800 (<https://github.com/mdbtools/mdbtools>). The survey is administered by the EPA and the States  
801 to assess funding needs for unfunded capital costs of treatment works projects that (1) address  
802 a water quality or related public health problem existing as of January 1, 2012, or is expected to  
803 occur within the next 20 years and (2) meet the CWNS documentation criteria. CWNS  
804 documentation criteria includes (1) description and location of the problem, (2) site-specific  
805 solution to the problem, and (3) detailed cost information for implementing the solution. Data is  
806 collected about (1) publicly owned wastewater collection and treatment facilities, (2) combined  
807 sewer overflow control facilities, (3) stormwater management activities, and (4) decentralized  
808 wastewater treatment facilities. Data is collected on (a) estimated needs, costs and technical  
809 information, (b) facility location and contact information, and (c) facility population served, flow,  
810 effluent, and unit process information. Supporting documentation was required for the entered  
811 data with some exceptions (for instance small communities could use a more simple form), and  
812 quality control was performed by reviewers to compare documentation with data entered in the  
813 system to ensure consistency of technical and cost data [23]. Data entry occurred from January  
814 to December 2012.

815

816 There was large variability in the level of effort and resources that each state put into the survey.  
817 New York, California, Florida, New Jersey, Maryland, Iowa, Minnesota, and Michigan likely  
818 invested heavily in participating in the survey or already had similar state-level data collection  
819 systems in place for getting comprehensive responses [22,48,49].

820

821 Facilities not included in the dataset are those in South Carolina, the Northern Mariana Islands,  
822 and American Samoa as they did not participate in the survey; facilities whose projects did not  
823 have documented solutions or cost estimates; privately owned wastewater facilities that serve  
824 privately owned industrial facilities, military installations, national parks, or other federal facilities;

825 facilities on tribal lands and in Alaskan Native Villages, which were separately surveyed by the  
826 Indian Health Service; and facilities with projects that had existing funding prior to January 1,  
827 2012. Additionally, larger facilities were more likely to be captured by the survey due to the  
828 resource requirements for obtaining the right documentation. To address this bias, the survey  
829 had decreased documentation needs for small communities (population  $\leq 10,000$ ); despite this,  
830 the small community facilities were still underrepresented (pg. 2 of Ref. [24]).

831  
832 We filtered the facilities to the current facilities of type “collection: combined sewers” or  
833 “collection: separate sewers”. The population receiving collection is taken from the reported total  
834 number of residents who are connected to a sewer system which empties into a treatment plant.  
835 This does not include non-resident populations, populations served by acceptable decentralized  
836 wastewater treatment systems, or populations connected to sewers that do not discharge to a  
837 treatment plant.

838

### 839 **U.S. Census Bureau Island Areas Decennial Survey 2020**

840 The Island Areas Decennial Survey surveys housing, social, and economic information for all  
841 housing units in Guam, the Northern Mariana Islands, the Virgin Islands, and American Samoa  
842 [26]. Data of general demographic characteristics (DP01), selected economic characteristics  
843 (DP03), and selected housing characteristics (DP04) were downloaded from  
844 <https://data.census.gov/>. Housing characteristics included data for both occupied and vacant  
845 housing units.

846

### 847 **U.S. Census Bureau American Community Survey**

848 The American Community Survey (ACS) is a monthly survey of a representative subsample of  
849 addresses in the US [20] on characteristics of populations and households. The ACS 5 year

850 estimates (average over 5 years, less subject to fluctuations) for selected social characteristics  
851 (DP02), selected economic characteristics (DP03), and demographic and housing estimates  
852 (DP05) stratified county or county subdivision for select years were downloaded from  
853 <https://data.census.gov/>.

854

## 855 **Data analysis and visualization**

### 856 **Florida Department of Health onsite sewage treatment and disposal** 857 **system inspections dataset analysis**

858 The number of septic tanks in each county subdivision was calculated as the number of septic  
859 permits whose latitude and longitude occurred inside the boundaries of each county subdivision  
860 according to the 2012 U.S. Census Bureau county subdivision TIGER shapefile. To calculate  
861 the fraction of a county subdivision connected to septic tanks, the number of septic tanks in  
862 each county subdivision was divided by the number of households in the county subdivision as  
863 reported by the 2012 American Community Survey 5-year estimate. Only county subdivisions  
864 with at least 5 households and 20 population size were used.

865

### 866 **Utah Municipal Wastewater Planning Program Survey analysis**

867 The population in each county receiving collection was calculated by summing the population  
868 receiving collection across all reported facilities in that county. The population in each county  
869 subdivision receiving collection was calculated by summing the population receiving collection  
870 across all reported facilities whose latitude and longitude fell within that county subdivision's  
871 boundaries from the 2021 TIGER shapefile. To calculate the fraction of a county or county  
872 subdivision receiving sewer collection, the population receiving collection was divided by the  
873 population size of each county or county subdivision reported by the 2021 American Community

874 Survey 5-year estimate. Only county subdivisions with at least 5 households and 20 population  
875 size were used.

876

## 877 **U.S. Environmental Protection Agency Clean Watersheds Needs**

### 878 **Survey analysis**

879 To compare the EPA CWNS and AHS data in Core Based Statistical Areas (CBSA), counties  
880 were categorized into CBSAs using the February 2013 U.S. Census Bureau file. To calculate  
881 the fraction of a county receiving collection, the population size receiving collection in that  
882 county was divided by the population size of each county reported by the 2012 American  
883 Community Survey 5-year estimate. We flagged counties that had no facilities reported, which  
884 could either be because there were no facilities in that county or because of a lack of reporting,  
885 and counties that had >100% sewer connectivity by population (potentially due to misreporting  
886 or collection occurring across multiple counties) were set to 100% connectivity.

887

### 888 **U.S. Census Bureau Island Areas Decennial Survey analysis**

889 To calculate the fraction of a Census Designated Place (CDP) connected to sewers, the number  
890 of households connected to sewers was divided by the total number of households in a CDP.  
891 Only CDPs with at least 5 households and 20 population size were used.

892

### 893 **Generation of maps**

894 TIGER shapefiles from the U.S. Census Bureau in the closest matching year to the dataset  
895 were used for generating maps. Maps were generated using the geopandas package (version  
896 0.12.2) in Python (version 3.11.0) and were displayed in the Mercator projection.

897

## 898 Simulations of interacting populations and wastewater

### 899 sampling

900 Two interacting populations are modeled in a compartmental model with susceptible, infected,  
901 and recovered (SIR) compartments for each population. The number of susceptible, infected,  
902 and recovered individuals in population A ( $S_A$ ,  $I_A$ , and  $R_A$ , respectively) and in population B ( $S_B$ ,  
903  $I_B$ , and  $R_B$ , respectively) are described by:

$$904 \frac{dS_A}{dt} = -\beta_A(1 - \varepsilon)I_A \frac{S_A}{N_A} - \beta_B \varepsilon I_B \frac{S_A}{N_A}$$

$$905 \frac{dS_B}{dt} = -\beta_B(1 - \varepsilon)I_B \frac{S_B}{N_B} - \beta_A \varepsilon I_A \frac{S_B}{N_B}$$

$$906 \frac{dI_A}{dt} = \beta_{AA}(1 - \varepsilon)I_A \frac{S_A}{N_A} + \beta_{BA}\varepsilon I_B \frac{S_A}{N_A} - \gamma_I I_A$$

$$907 \frac{dI_B}{dt} = \beta_{BB}(1 - \varepsilon)I_B \frac{S_B}{N_B} + \beta_{AB}\varepsilon I_A \frac{S_B}{N_B} - \gamma_I I_B$$

$$908 \frac{dR_A}{dt} = \gamma_I I_A$$

$$909 \frac{dR_B}{dt} = \gamma_I I_B$$

910 where  $N_A$  and  $N_B$  are the number of individuals in populations A and B respectively,  $\beta_A$  and  $\beta_B$   
911 are the overall contact rates of populations A and B respectively times the probability of infection  
912 given contact,  $\gamma_I$  is the rate of recovery.  $\varepsilon$  is the fraction of the total contacts made by individuals  
913 in a population that occurs with individuals in the other population and it describes the  
914 interaction strength between the two populations.  $\varepsilon$  can take on values between 0 and 1, where  
915  $\varepsilon=0$  indicates that all interactions occur within each population and none between populations,  
916 and  $\varepsilon=1$  indicates that all interactions occur between the populations and none within

919 populations. The base parameters are set at  $N_A=N_B=5000$ ,  $\gamma_I=0.18$  inverse days,  $R_0^A = R_0^B =$   
920  $\frac{\beta_A}{\gamma_I} = \frac{\beta_B}{\gamma_I} = 1.5$ , which represent an outbreak similar to COVID-19, but the parameters are varied  
921 in sensitivity analyses. The initial condition was a single infected individual in population A ( $I_A=1$ )  
922 and all other individuals were susceptible ( $S_A=N-1$ ,  $S_B=N$ ,  $I_B=0$ ,  $R_A=0$ ,  $R_B=0$ ). The differential  
923 equations are solved deterministically using the `integrate.odeint` function in the `scipy` package  
924 (version 1.6.2) in Python using a timestep of 0.1 days.

925

926 The concentration  $C$  of the pathogen in wastewater is given by

927

$$928 \quad C = \frac{n_A + n_B}{v_A + v_B}$$

929

930 where  $n_A$  and  $n_B$  are the number of copies of pathogen genetic material (DNA or RNA) shed per  
931 day by population A and B, respectively, into the sampled wastewater and  $v_A$  and  $v_B$  are the  
932 volume of wastewater produced per day by population A and B, respectively, into the sampled  
933 wastewater.

934

935 The number of copies of pathogen genetic material,  $n_A$  and  $n_B$ , shed per day by population A  
936 and B, respectively, into the sampled wastewater is given by

937

$$938 \quad n_A = nI_A f_A$$

$$939 \quad n_B = nI_B f_B$$

940

941 Where  $n$  is the number of copies of pathogen genetic material shed per infected person per day  
942 (assumed to be the same for all infected individuals) and  $f_A$  and  $f_B$  are the fraction of total shed

943 pathogen genetic material by population A and B respectively that is sampled by wastewater  
944 (determined by the sewer connectivity of each of the populations).

945

946 The volume of wastewater,  $v_A$  and  $v_B$ , produced per day by population A and B, respectively,  
947 into the sampled wastewater is given by

948 
$$v_A = vN_A f_A$$

949 
$$v_B = vN_B f_B$$

950

951 where  $v$  is the volume of wastewater produced per person per day (assumed to be the same for  
952 all individuals). The value used for  $n$  was  $5 \times 10^{6.7}$  gene copies/person/day (estimate taken from  
953 Ref. [51] by multiplying  $10^{4.7}$  gene copies/mL feces by 500 mL feces/day/person) and for  $v$  was  
954 20 liters wastewater/person/day (per person daily wastewater usage approximated from per  
955 household daily wastewater usage from Ref. [52] assuming 4 people per household).

956

957 In addition to the assumptions mentioned above, the model makes the following additional  
958 assumptions: The probability of an infected individual shedding pathogen genetic material to  
959 wastewater is 1. Given that there is pathogen genetic material present in wastewater, the  
960 probability of detecting it is 1. Shedding of pathogen genetic material occurs only when an  
961 individual is infected. There are no stormwater contributions to wastewater to dilute the  
962 pathogen concentration.

963

964 To calculate the time of the maximum number of infections in a population and the time of the  
965 maximum concentration of pathogen gene content in wastewater data, we numerically  
966 calculated the time derivative at the midpoints of the time points as the difference between  
967 consecutive datapoints divided by the time interval and took the first time point at which the  
968 derivative crossed 0.



969

970

## 971 **S2 Appendix. Supplementary analyses.**

### 972 **Compilation of data and assessment of data completeness**

973 As the AHS does not provide finer scale geographic information than the census division for  
974 households outside of the 35 selected large metropolitan areas, we used the American  
975 Community Survey, which reports the percentage of occupied housing units lacking complete  
976 plumbing facilities by county and which allowed us to define the lower bound on the percentage  
977 of the population not connected to sewers. Additionally, we identified several state-level  
978 datasets, including locations of permitted septic tanks in Florida, sewer locations and  
979 populations served in Utah and Minnesota, and the 2012 EPA Clean Watersheds Needs Survey  
980 of sewer locations and populations served for 49 states (South Carolina did not participate).  
981 However, many of these state-level datasets are incomplete or potentially biased and thus only  
982 allow qualitative analyses. Finally, the 2020 US Census' Island Areas Decennial survey  
983 provided information the percentage of households connected to sewer by Census Designated  
984 Place in the island areas of American Samoa, Guam, the Northern Mariana Islands, and the  
985 Virgin Islands (see **Error! Reference source not found.** and Table S 3 for a summary of  
986 datasets).

987  
988 We checked the consistency of the Florida Department of Health onsite sewage treatment and  
989 disposal systems inspections data reported in 2012 with other sources. We noted that an  
990 estimated 7% of households across the state were connected to septic tanks, but that this was  
991 substantially less than the Florida Department of Environmental Protection's estimate that  
992 approximately one third of Florida's population uses septic tanks [21] even after accounting for  
993 potential correlations of septic usage with household size (approximate increase in household  
994 size of 10% for a 50% increase in septic connectivity (**Fig S 5**) cannot explain the almost 5 time

995 difference in septic connectivity across the two sources), suggesting that more households may  
996 be on septic tanks, and thus less on sewer systems. This discrepancy may exist because not  
997 every septic tank had a permit recorded in the state system, because there were changes since  
998 2012, or because of uncertainty in the Florida Department of Environmental Protection's  
999 estimate. Thus, we focused our analysis on relative comparisons across county subdivisions  
1000 (Fig 4).

1001  
1002 The 2012 EPA Clean Watersheds Needs Survey dataset includes voluntary submissions of the  
1003 locations of publicly owned wastewater collection and treatment facilities and their estimated  
1004 population served. The following states had among the highest reported needs and survey  
1005 participation level (pg. 6 and Table A-1 of Ref. [24]) and were the focus of our analyses: New  
1006 York, California, Florida, New Jersey, Maryland, Iowa, Minnesota, and Michigan. Comparison of  
1007 Florida in the EPA and Florida Department of Public Health datasets showed consistent spatial  
1008 trends (less connection to sewers and more connection to septic systems in the panhandle and  
1009 inland) (Fig 4 and Fig S 9). Additionally, in both datasets, counties with more connection to  
1010 sewers are more Asian (EPA: Pearson  $r = 0.53$  ( $p = 4.2 \times 10^{-4}$ ), Florida Department of Public  
1011 Health: Pearson  $r = 0.31$  ( $p = 3.2 \times 10^{-7}$ )). Comparison of Minnesota in the EPA dataset,  
1012 Minnesota Wastewater Infrastructure Needs Survey, and Minnesota SSTS datasets also  
1013 showed consistent spatial trends (more connection to sewers and less connection to subsurface  
1014 sewage treatment systems around Minneapolis) (**Fig S 11**). We found a significant correlation  
1015 between the AHS and EPA datasets for the largest 35 metropolitan areas in the states with  
1016 good data collection (**Fig S 12**), despite deviations from a one-to-one correspondence  
1017 suggesting overall systematic biases in the data.

1018  
1019 The 2021 Utah Municipal Wastewater Planning Survey estimated the populations receiving  
1020 collection by municipal utilities that owned or operated a sanitary sewerage system. The

1021 purpose of the survey is to aid in overseeing and communicating with the wastewater industry in  
1022 Utah. We noticed that these data may have not be quantitatively accurate but are likely  
1023 qualitatively informative. First, large swaths of the state appeared not to receive wastewater  
1024 collection (**Fig S 13**), but this may partly reflect that only 71% of contacts responding to the  
1025 survey [47]. Second, in some county subdivisions, >100% of the population appeared  
1026 connected to sewers, likely due to errors in estimation, differences in how combined treatment  
1027 and collection facilities reported population estimates, or collection populations resided in  
1028 neighboring county subdivisions. While the 5 county subdivisions with the highest percentages  
1029 of American Indian and Alaska Natives (~20-100%) were reported to not be connected to  
1030 sewers at all in this dataset, we believe this is because Indian reservations are not included in  
1031 the dataset (as they are under federal, not state jurisdiction). In fact, all 5 of these counties  
1032 (Uintah and Ouray, Casa del Eco Mesa-White Mesa, West Juab, Oljato, Blanding) include  
1033 Indian reservations. Additionally, the county subdivision with the highest percentage of Black or  
1034 African American; Native Hawaiian and Other Pacific Islander; or Hispanic are in county  
1035 subdivisions has nobody receiving collection (**Fig S 14**); however, we cannot rule out that this is  
1036 due to underreporting from these county subdivisions.

1037  
1038 The 2021 Minnesota Wastewater Infrastructure Needs Survey reported whether communities  
1039 have a collection system. The data from this survey was geographically sparse, as communities  
1040 (the level of aggregation of the dataset) often directly mapped to a census designated place  
1041 (CDP), and CDPs do not cover the entire state (**Fig S 11a**). Consequently, the sewer  
1042 connectivity of the rural areas between census designated places could not be determined from  
1043 this dataset. Additionally, not all communities responded to the survey. Of the 523 communities  
1044 that participated in the survey, all but 11 had a collection system. The geographic distribution of  
1045 sewer connectivity qualitatively matched that of the 2017 Subsurface Sewage Treatment  
1046 Systems (SSTS) Annual Report of the number of reported subsurface sewage treatment

1047 systems (septic tanks) by county in Minnesota (**Fig S 11b**); however, 7 out of the 218 contacted  
1048 local government units did not respond, 14 reported having zero SSTS within their jurisdiction  
1049 despite permitting SSTS and not all SSTS programs were able to be identified to be contacted.

1050  
1051 Given the data incompleteness and biases for the Utah and Minnesota datasets, we excluded  
1052 them from the analyses in the main text.

1053

## 1054 **Sewer connectivity in the U.S. Island Areas**

1055 From the 2020 US Census Island Areas Decennial Survey of household characteristics, the  
1056 overall levels of household sewer connection in the island areas were lower than in the states  
1057 (**Fig S 15**). In Guam, the Northern Mariana Islands, the Virgin Islands, and American Samoa,  
1058 the overall connection to sewer systems across each island was 65%, 51%, 66%, and 52% of  
1059 households, respectively (compared to an overall 83% connection across mainland US). To ask  
1060 whether there was strong spatial variability across each island, we looked at the median  
1061 household connection by Census Designated Place (CDP). A median of 64%, 32%, 70%, and  
1062 13% households by CDP in Guam, the Northern Mariana Islands, the Virgin Islands, and  
1063 American Samoa, respectively, were connected to sewers. This suggests that sewer  
1064 connectivity is particularly spatially concentrated in the Northern Mariana Islands and American  
1065 Samoa (difference in median household connection by CDP and overall island connection),  
1066 although all island areas showed some spatial variability in connectivity when visually assessing  
1067 maps (**Fig S 16**). The only significant correlation of sewer connectivity with demographic or  
1068 economic characteristics was in American Samoa, where CDPs with a higher percentage of  
1069 Black or African Americans were more connected to sewers (Pearson  $r = 0.38$ ,  $q$ -value = 0.01).

1070 **Supplementary figures**

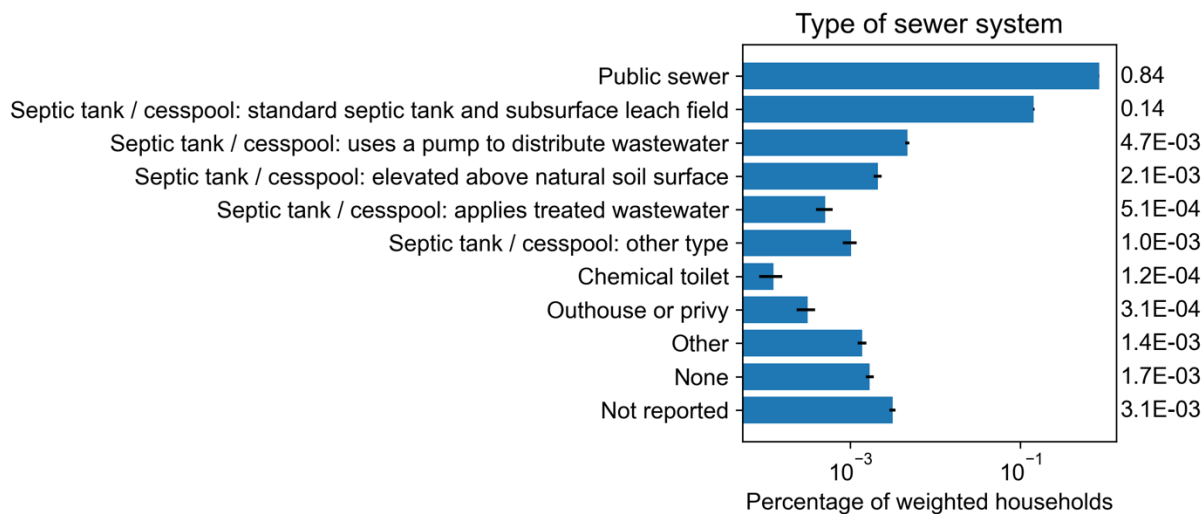

1071  
1072 **Fig S 1: Percentage of households connected to various wastewater processing systems.**  
1073 Data are from 2021 American Housing Survey.

By core-based statistical areas (2019, 2021)

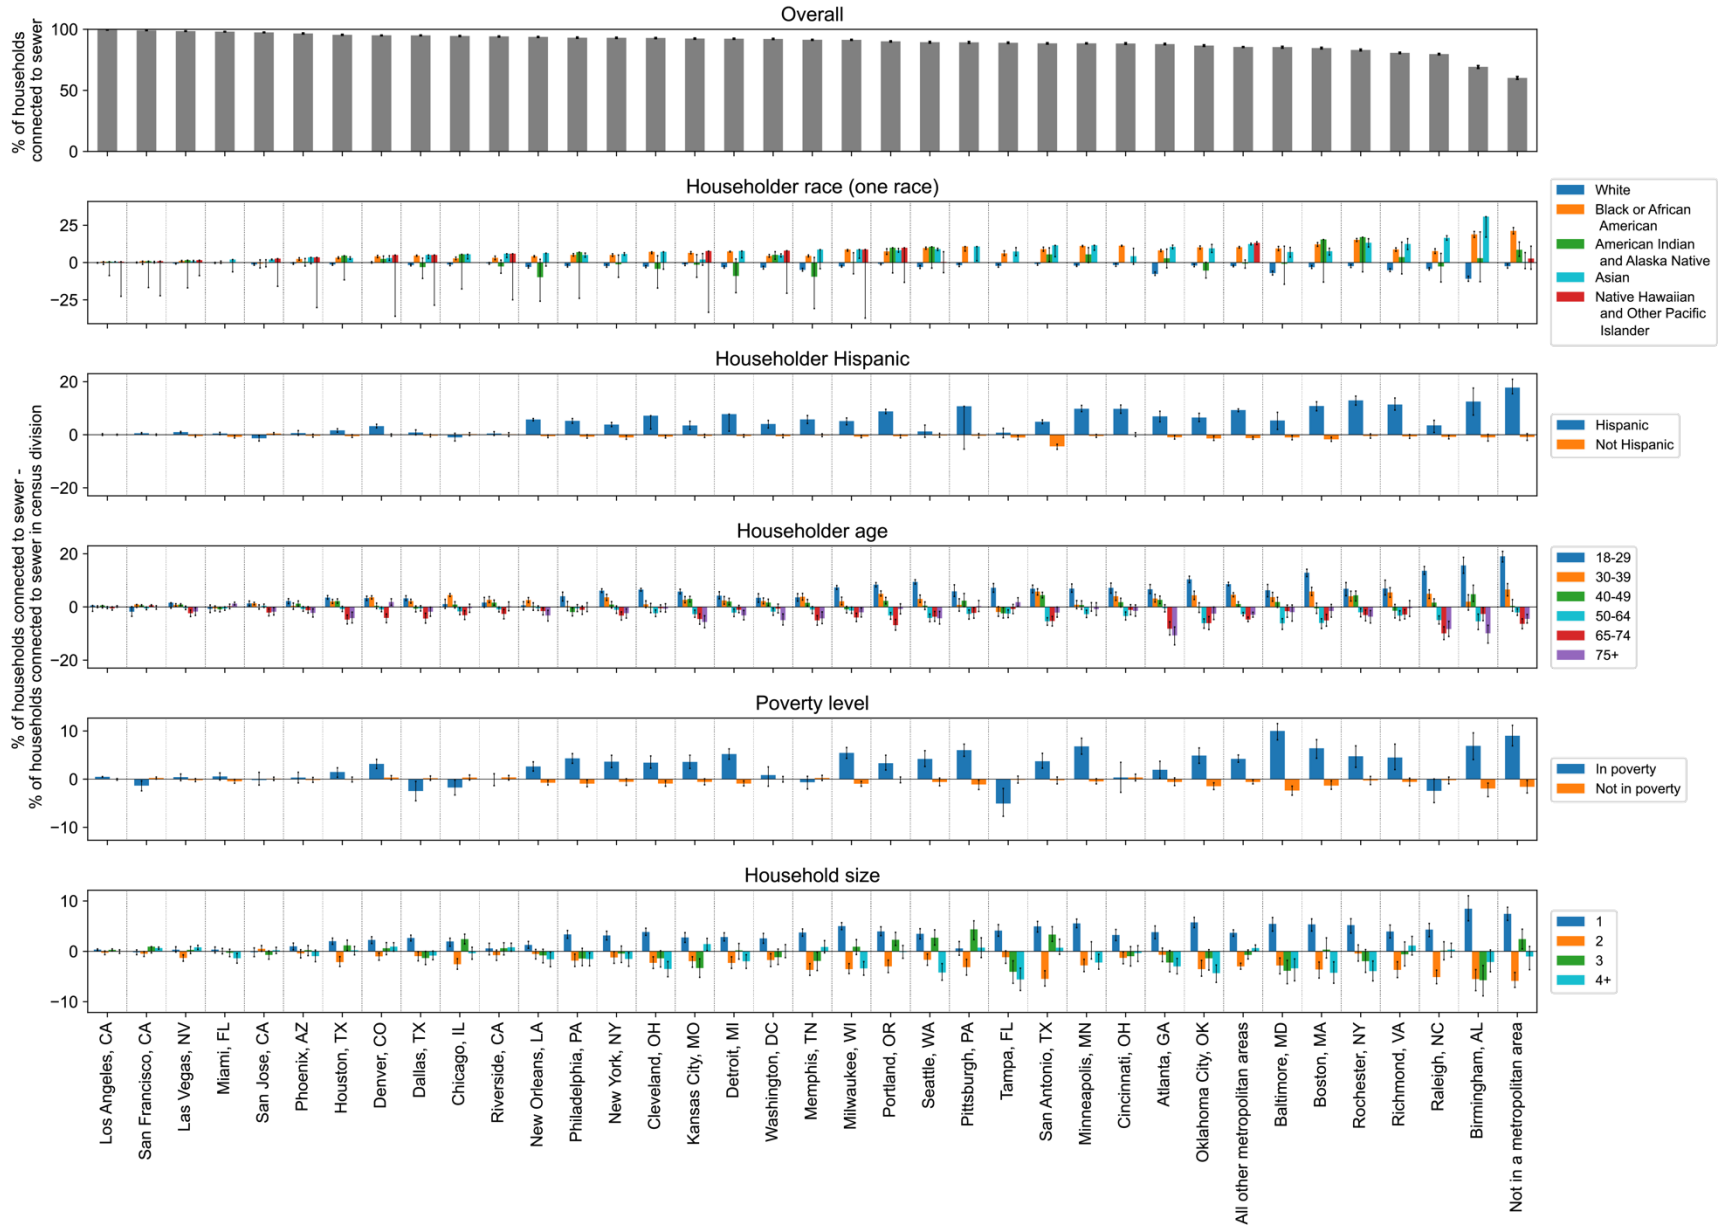

1075 **Fig S 2: Top 35 metropolitan areas' connectivity to public sewers by demographics.** Data are from the 2019 and 2021 U.S.  
1076 Census American Housing Survey [11,16].



## Percent of occupied housing units lacking complete plumbing facilities by county

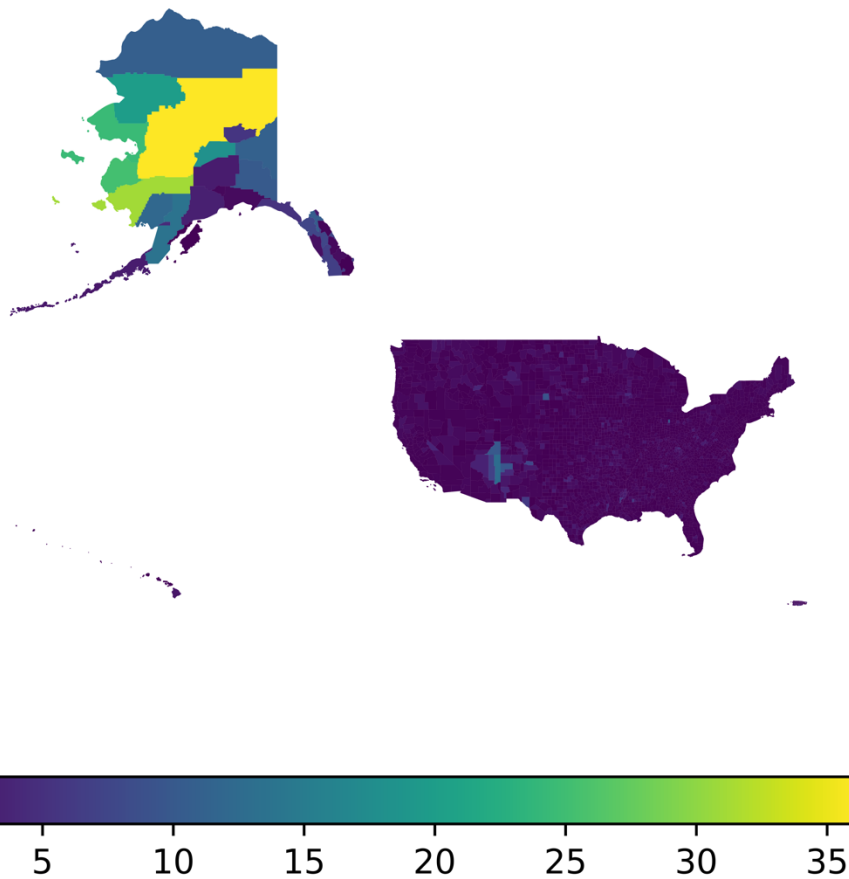

1077

1078

1079

**Fig S 3: Percent of occupied housing units lacking complete plumbing facilities by county.** Data are from the 2021 U.S. Census American Community Survey.

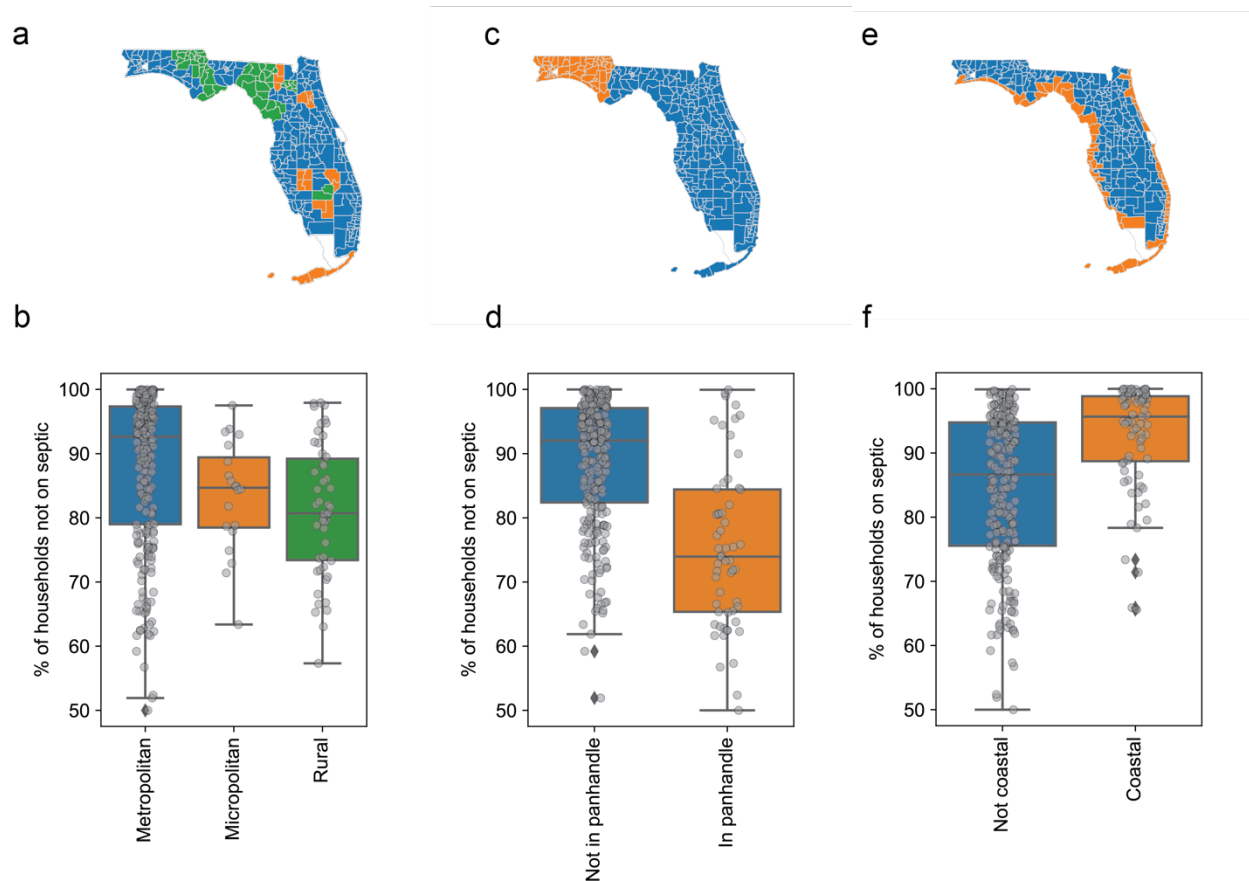

1080

1081 **Fig S 4: Comparison of percentage of households not on septic across different**  
1082 **geographies in Florida.** Data are from the Florida Department of Health septic tank inspection  
1083 permits reported in 2012. (a) Map of county subdivision colored by whether it is a Metropolitan  
1084 Statistical Area (blue), Micropolitan Statistical Area (orange), or Rural Area (neither metropolitan  
1085 not micropolitan, green). (b) Percentage of households not on septic in county subdivisions  
1086 stratified by whether the county subdivision is a Metropolitan Statistical Area, Micropolitan  
1087 Statistical Area, or Rural Area. County subdivisions that are Metropolitan Statistical Areas have  
1088 a higher percentage of households not on sewer than those that are Micropolitan Statistical  
1089 Areas, but the effect is not significant ( $p = 0.052$ ). County subdivisions that are Micropolitan  
1090 Statistical Areas have a higher percentage of households not on sewer than those that are  
1091 Rural Areas, but the effect is not significant ( $p = 0.37$ ). (c) Map of county subdivisions colored by  
1092 whether they are always included in references to the Florida panhandle. Orange: county

1093 subdivisions in the panhandle. Blue: county subdivisions not in the panhandle. (d) Percentage of  
1094 households not on septic in county subdivisions stratified by whether the county subdivision is in  
1095 the panhandle. Each point represents a county subdivision. County subdivisions in the  
1096 panhandle have a significantly lower percentage of households not on septic ( $p < 10^{-9}$ ). (e) Map  
1097 of county subdivisions colored by whether they have a coastline. Orange: county subdivision  
1098 with coastline. Blue: county subdivisions without coastline. (f) Percentage of households not on  
1099 septic in county subdivisions stratified by coastal and not coastal county subdivisions. Each  
1100 point represents a county subdivision. County subdivisions not on the coast have a significantly  
1101 higher fraction of households on septic ( $p < 10^{-9}$ ).

1102

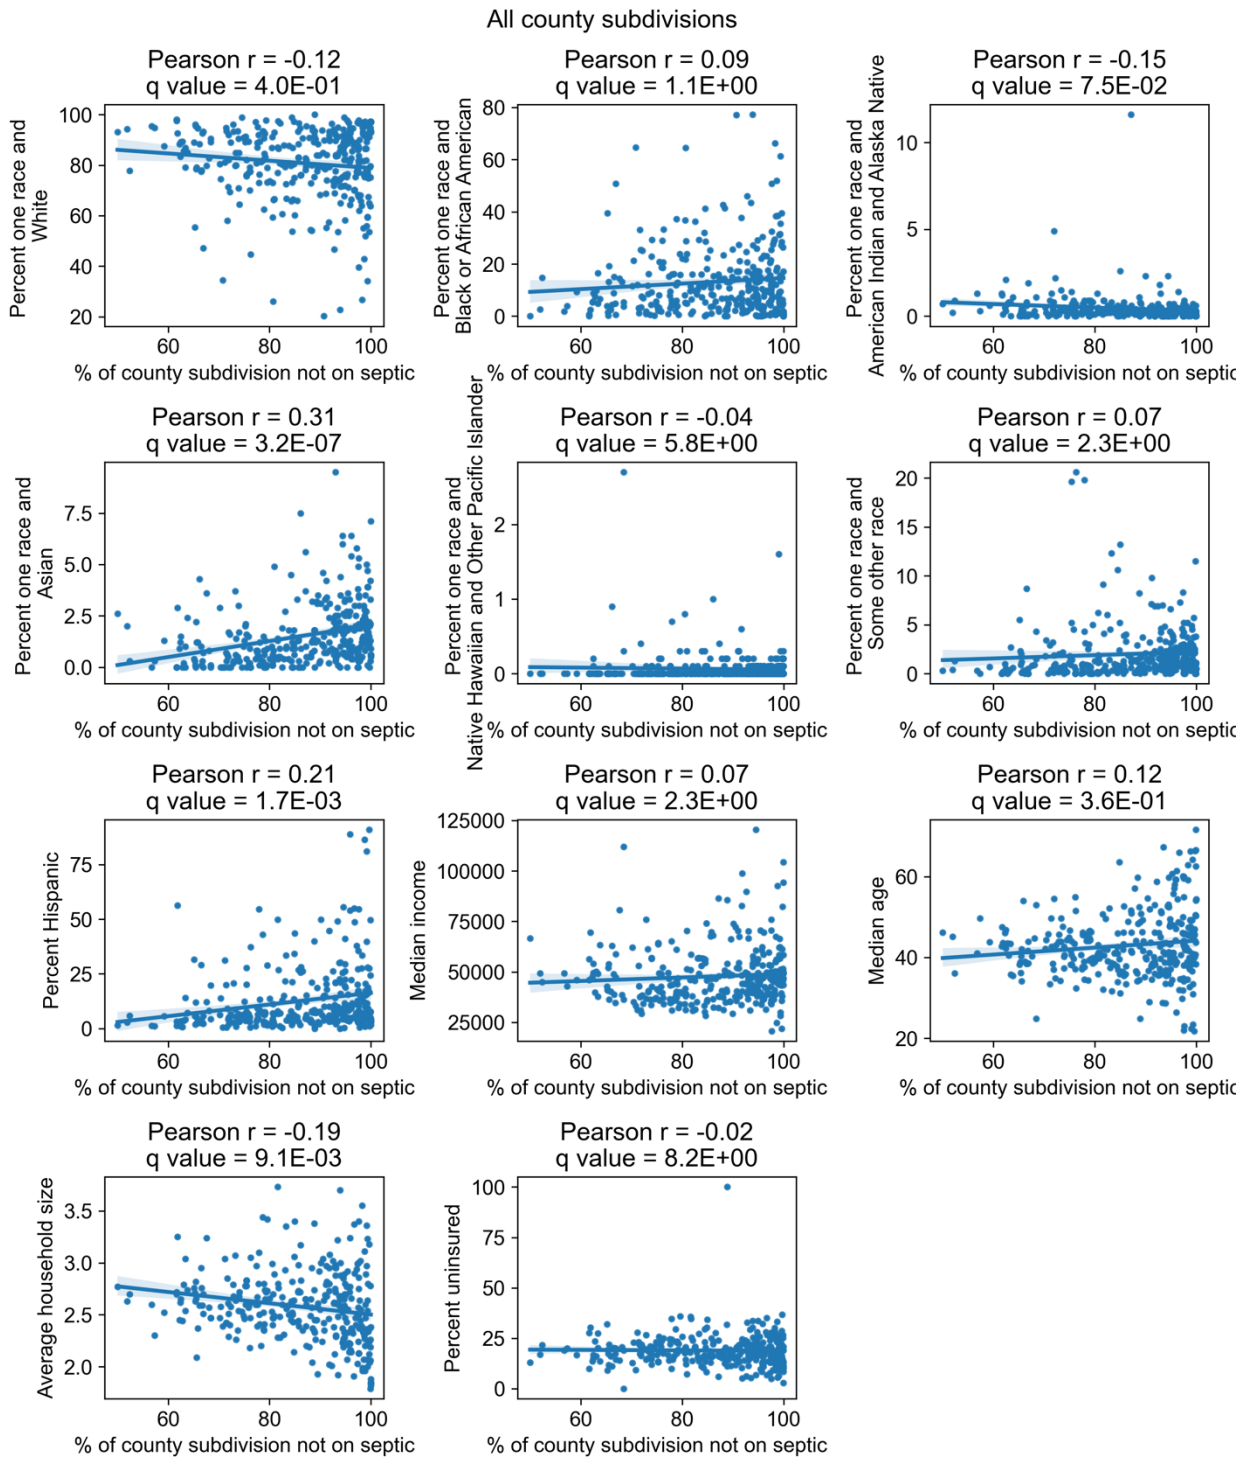

1103

1104

1105 **Fig S 5: Correlation of percentage of households in county subdivisions of Florida *not***  
1106 **connected to septic tanks with demographic and economic factors.** Data are from the  
1107 Florida Department of Health septic tank inspection permits reported in 2012. Each point  
1108 represents a county subdivision. Only county subdivisions with at least 5 households and 20  
1109 population size were included.  
1110

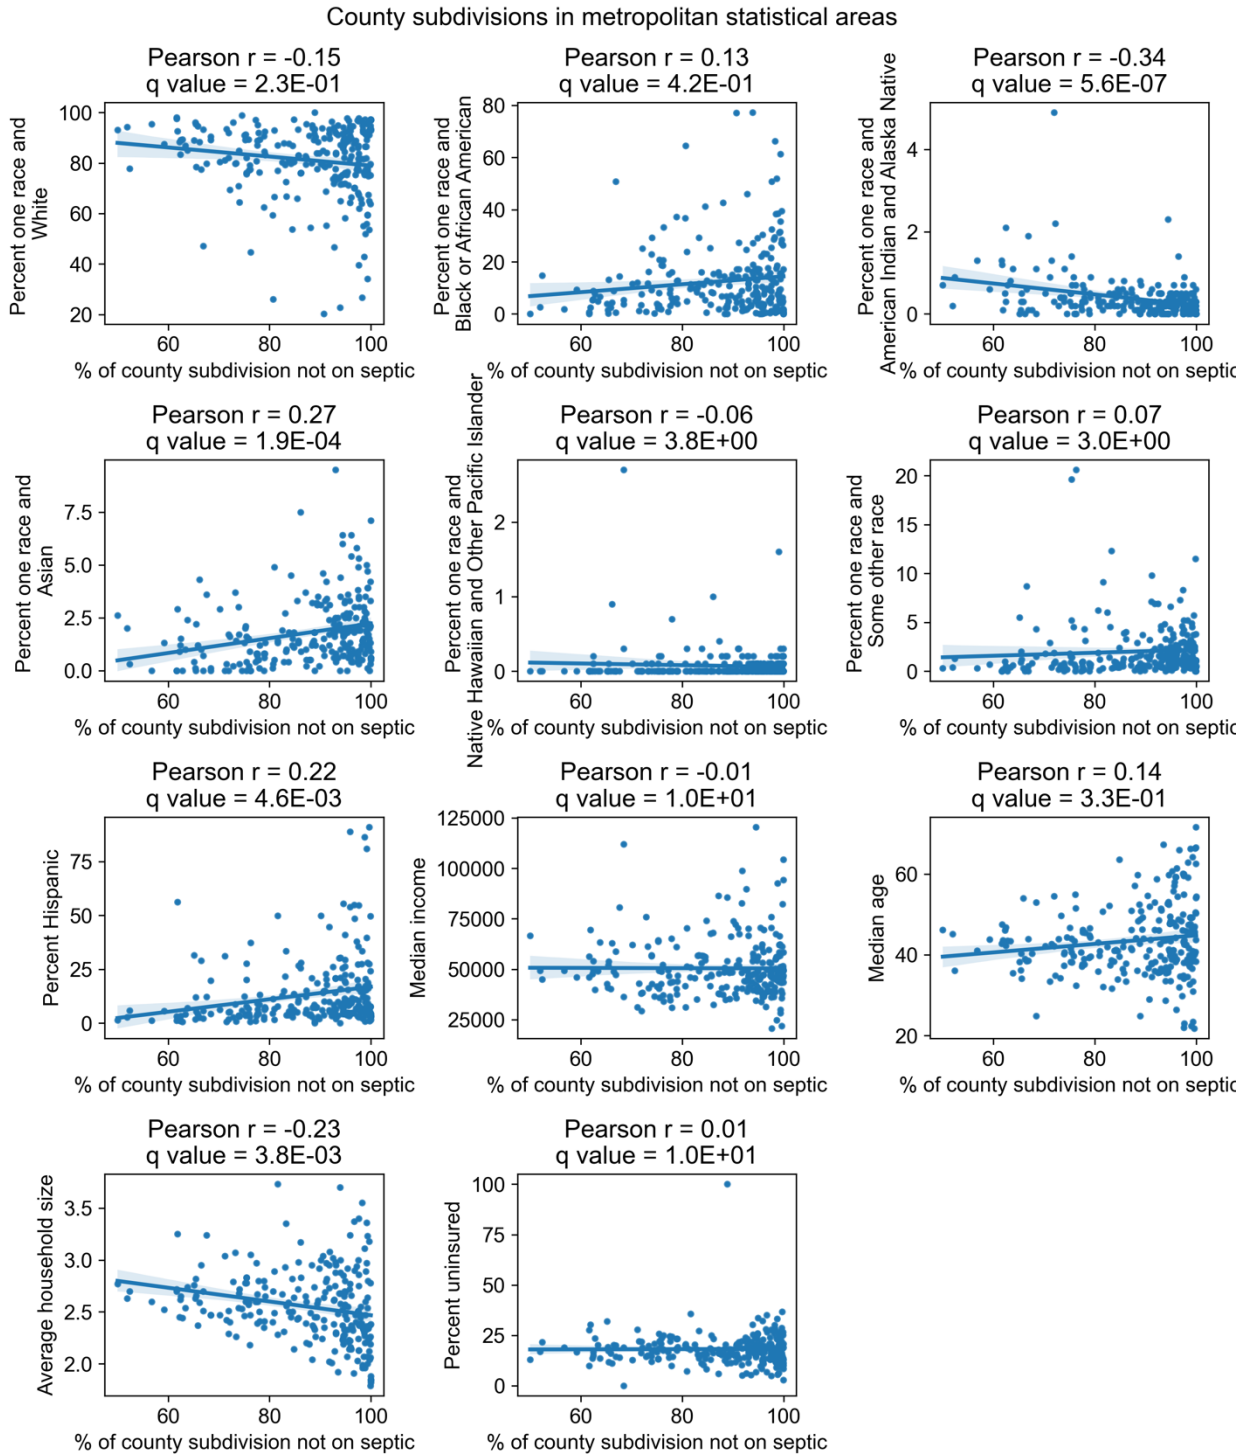

1111

1112 **Fig S 6: Correlation of percentage of households in county subdivisions of Florida in**

1113 **metropolitan statistical areas not connected to septic tanks with demographic and**

1114 **economic factors. Data are from the Florida Department of Health septic tank inspection**

1115 permits reported in 2012. Each point represents a county subdivision. Only metropolitan county  
1116 subdivisions with at least 5 households and 20 population size were included.

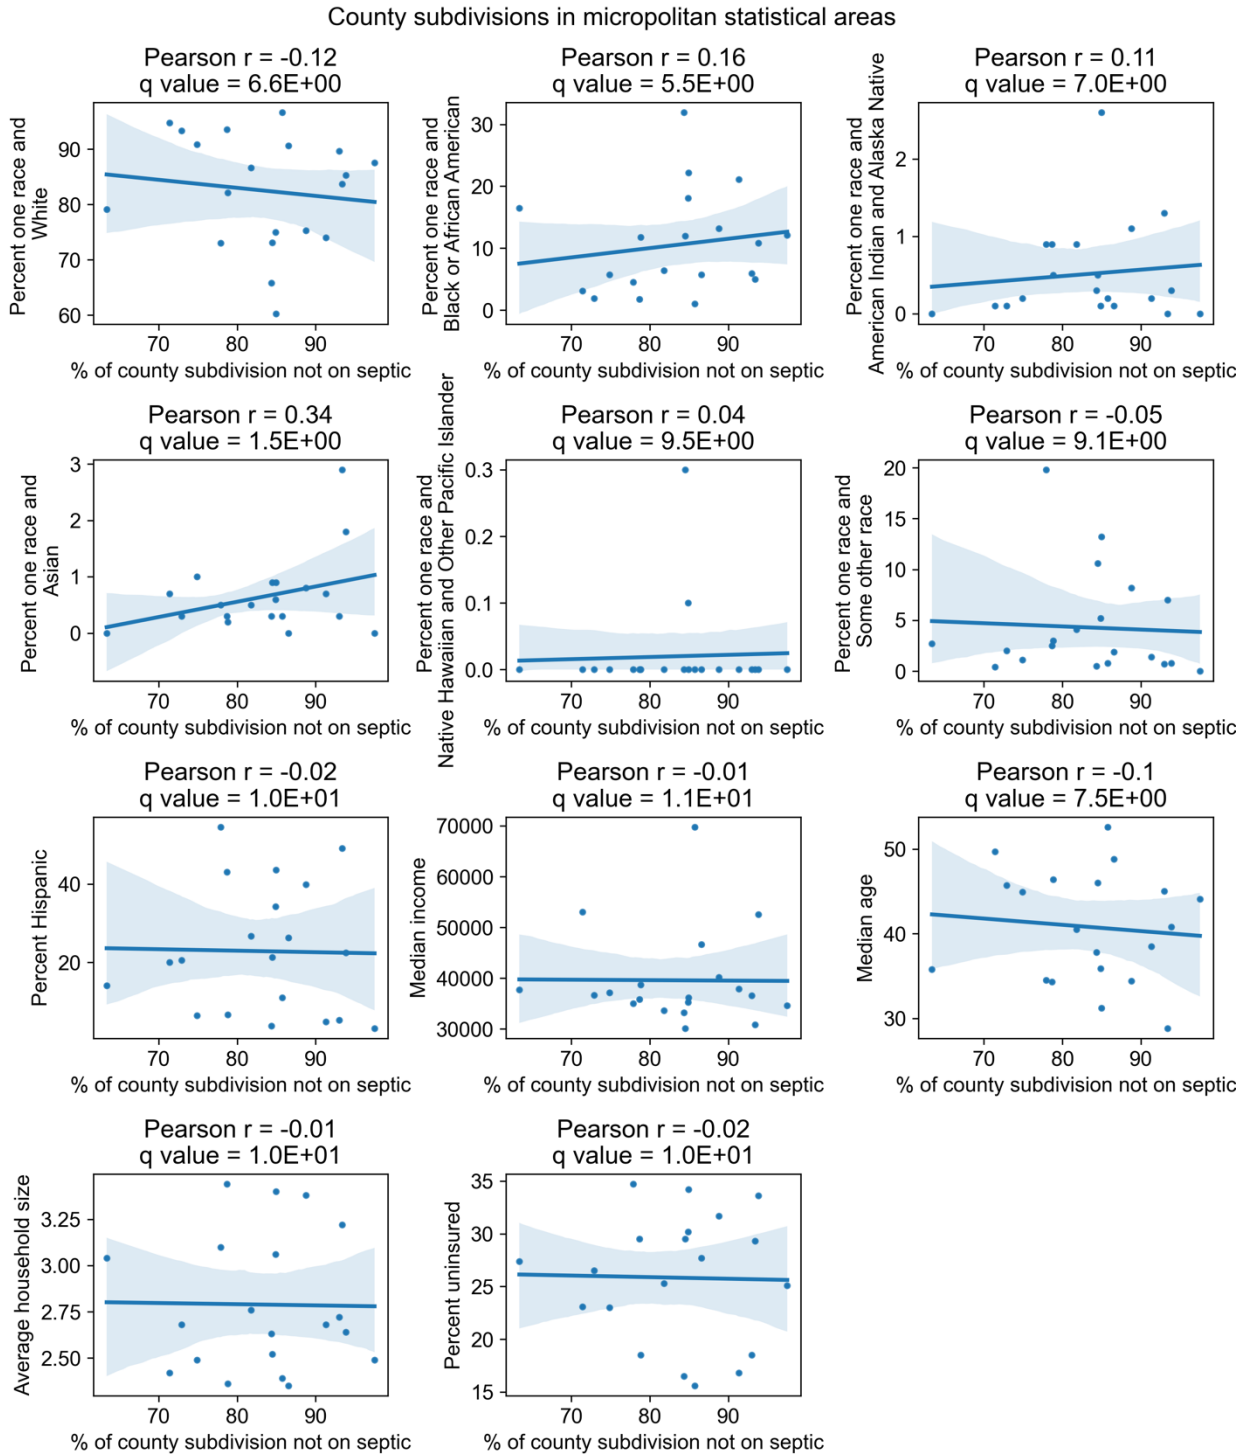

1117

1118 **Fig S 7: Correlation of percentage of households in county subdivisions of Florida in**

1119 **micropolitan statistical areas not connected to septic tanks with demographic and**

1120 **economic factors. Each point represents a county subdivision. Data are from the Florida**



- 1121 Department of Health septic tank inspection permits reported in 2012. Only micropolitan county  
1122 subdivisions with at least 5 households and 20 population size were included.

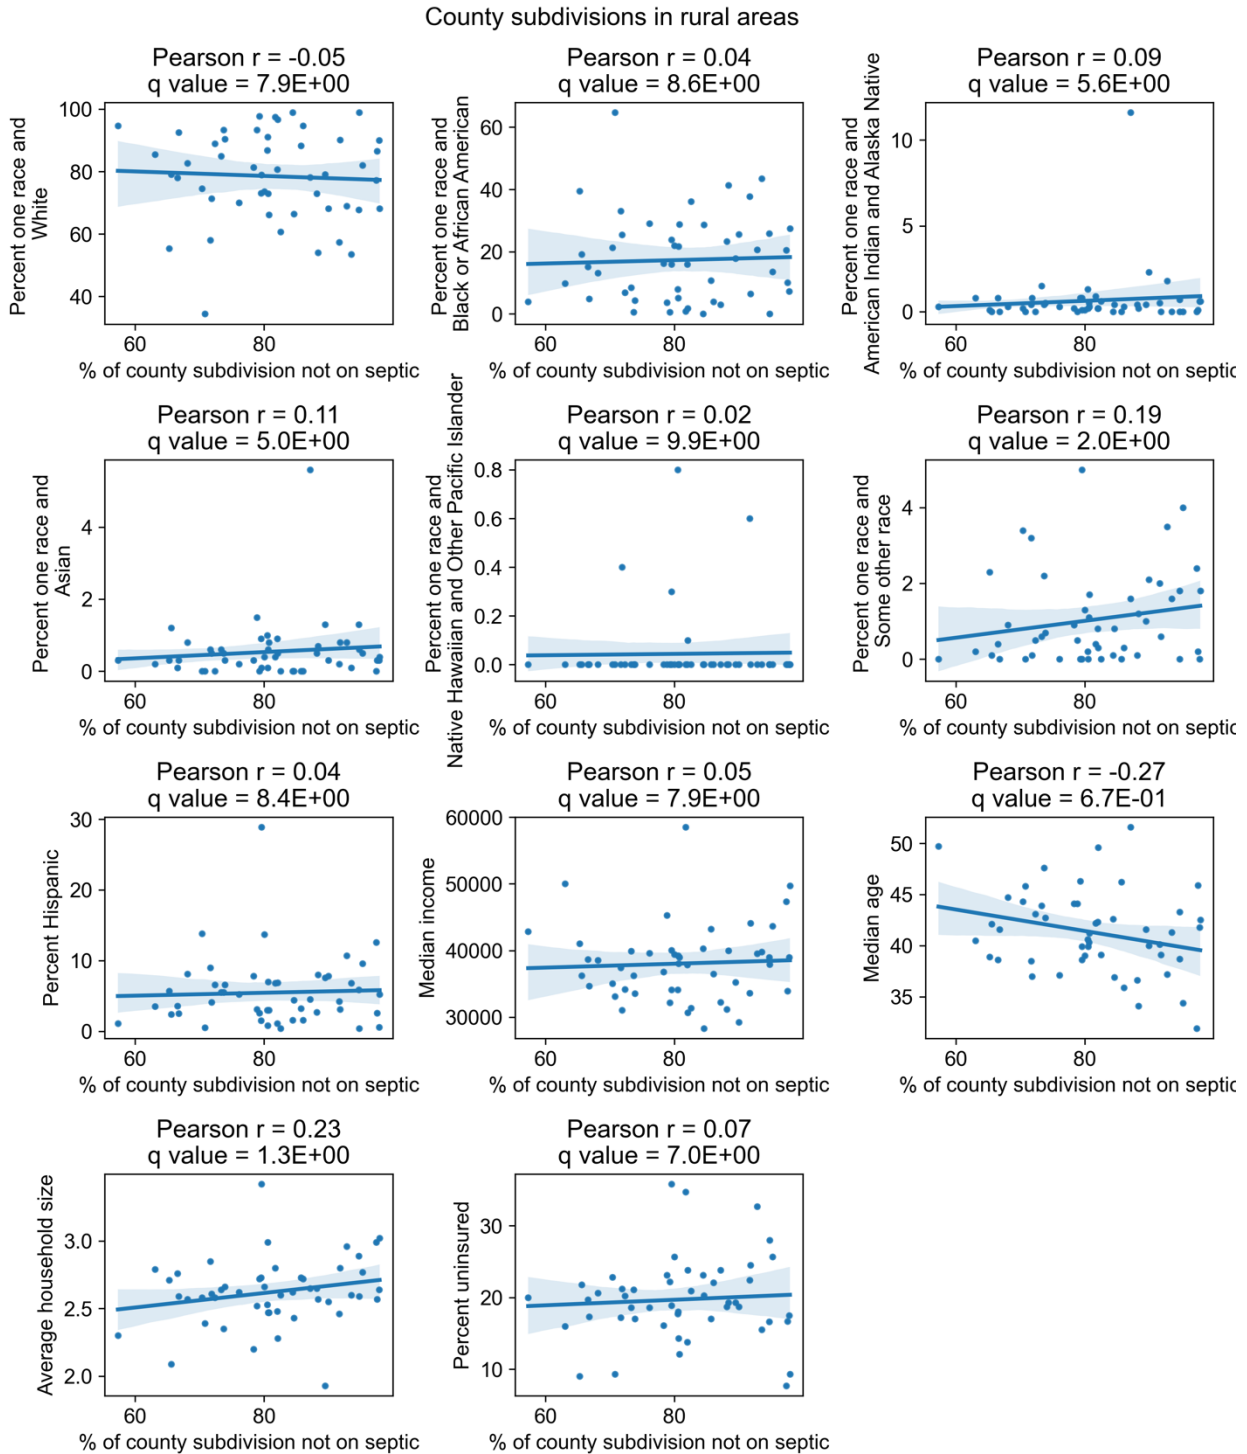

1123

1124 **Fig S 8: Correlation of percentage of households in county subdivisions of Florida in**  
 1125 **rural areas not connected to septic tanks with demographic and economic factors.** Data  
 1126 are from the Florida Department of Health septic tank inspection permits reported in 2012. Each

1127 point represents a county subdivision. Only rural county subdivisions with at least 5 households  
1128 and 20 population size were included.

1129

1130

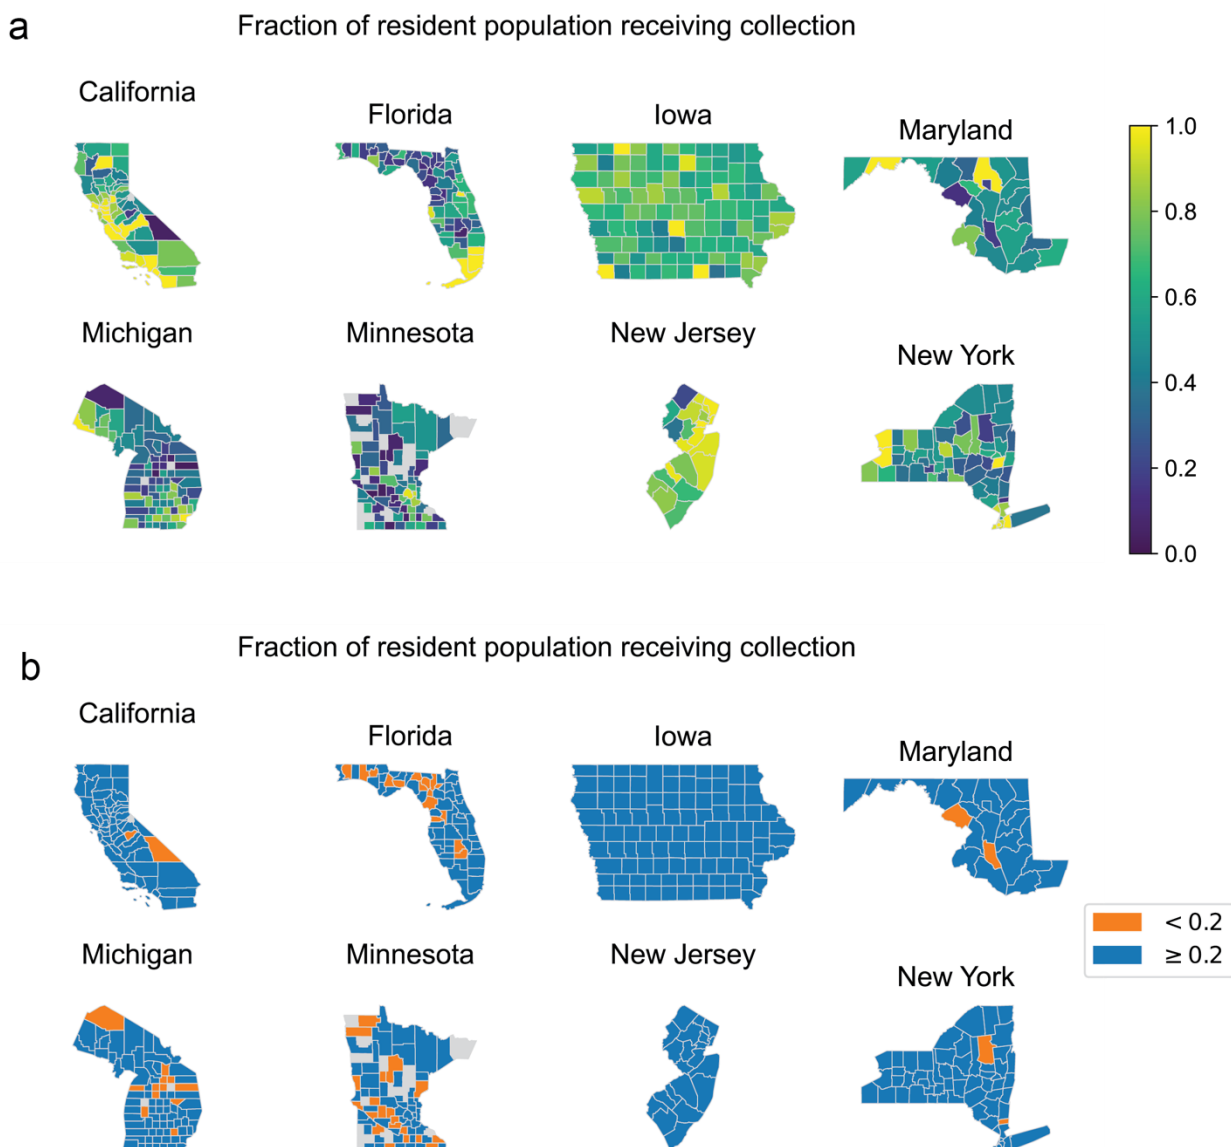

1131

1132 **Fig S 9: Fraction of present resident population receiving collection by county in 8**

1133 **states.** Data are from the 2012 EPA Clean Watersheds Needs Survey. (a) Fraction shown on a

1134 continuous scale. (b) Fraction above and below 0.2. Only states that had more comprehensive

1135 responses in the survey are shown. Counties that did not report any data in the survey are

1136 shown in gray. Counties that report more than 100% of the present resident population  
 1137 receiving collection are shown in (a) as 1 and in (b) as  $\geq 0.2$ .

1138

1139

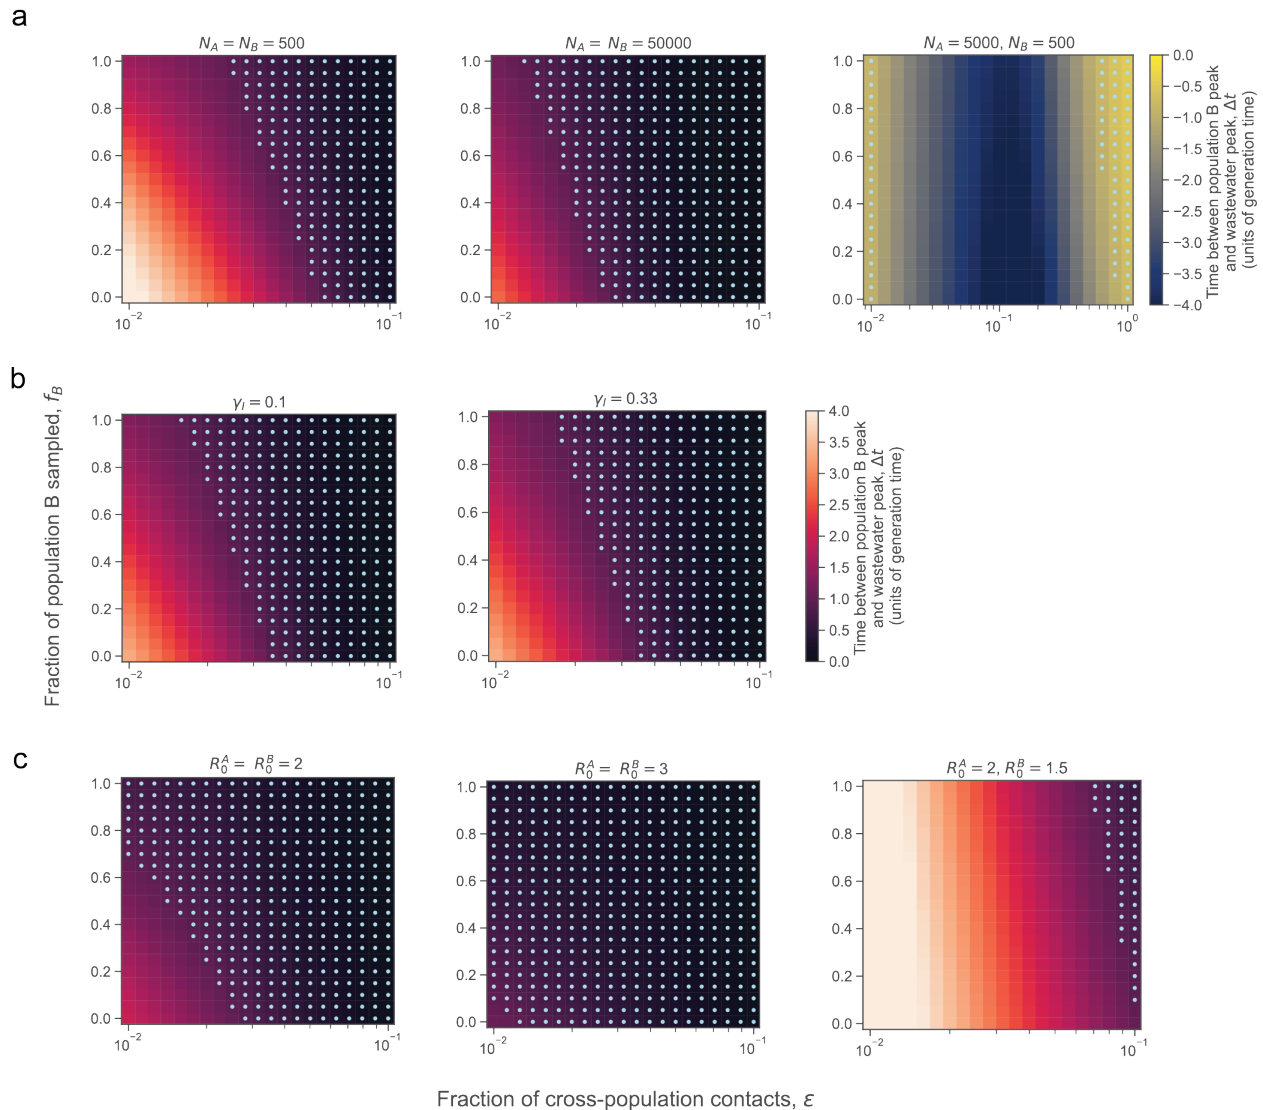

1140

1141 **Fig S 10: Sensitivity analysis of Fig 5c from main text.** The effect on the time between  
 1142 population B peak and wastewater peak of varying the (a) population size of the two populations  
 1143 ( $N_A, N_B$ ), (b) recovery rate ( $\gamma_i$  in units of inverse days), and (c) basic reproduction number of the  
 1144 two populations ( $R_0^A, R_0^B$ ) across a range of values. Unless where indicated, the parameters  
 1145 were  $N_A=N_B=5000$ ,  $\gamma_i=0.18$  days<sup>-1</sup>, and  $R_0^A, R_0^B=1.5$ .

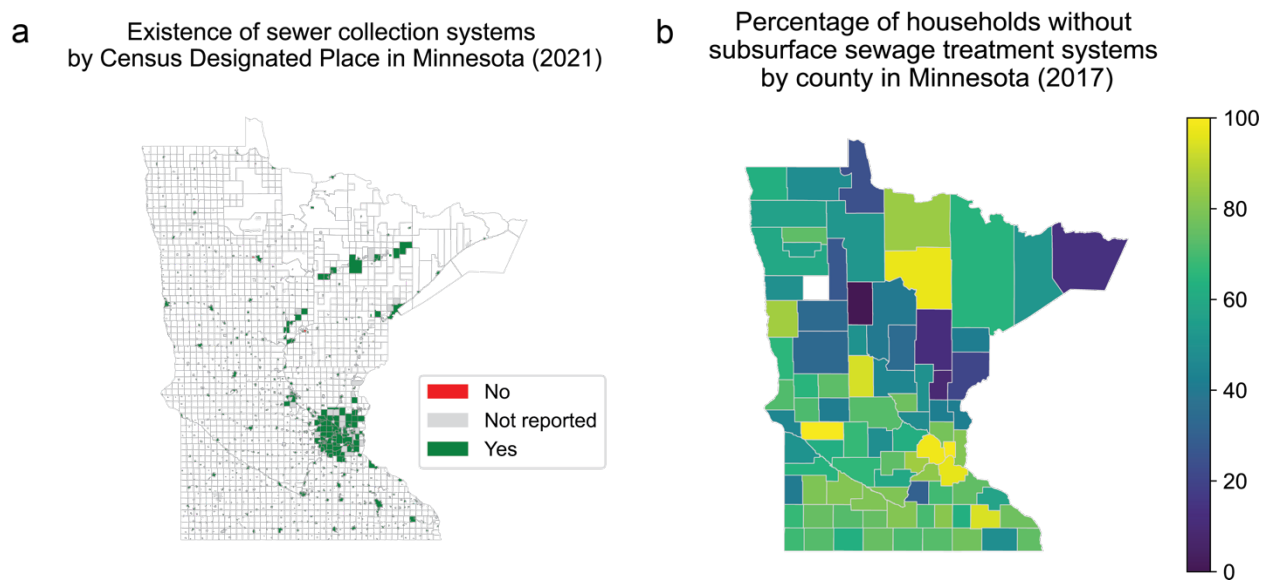

1146

1147 **Fig S 11: Sewer connectivity in Minnesota.** (a) Map showing whether a community in  
1148 Minnesota (mapped to Census Designated Place) reported having a collection system in the  
1149 2021 Minnesota Wastewater Infrastructure Needs Survey. Almost all communities mapped to  
1150 Census Designated Places. (b) Percentage of households without subsurface sewage treatment  
1151 systems (i.e. without septic tanks, suggesting sewerage) by county reported in the 2017  
1152 Subsurface Sewage Treatment Systems in Minnesota Annual Report [49]. Counties reporting  
1153 more than 100% of households having subsurface sewage treatment systems are set at 100%  
1154 (shown as 0% without subsurface sewage treatment systems in the map).

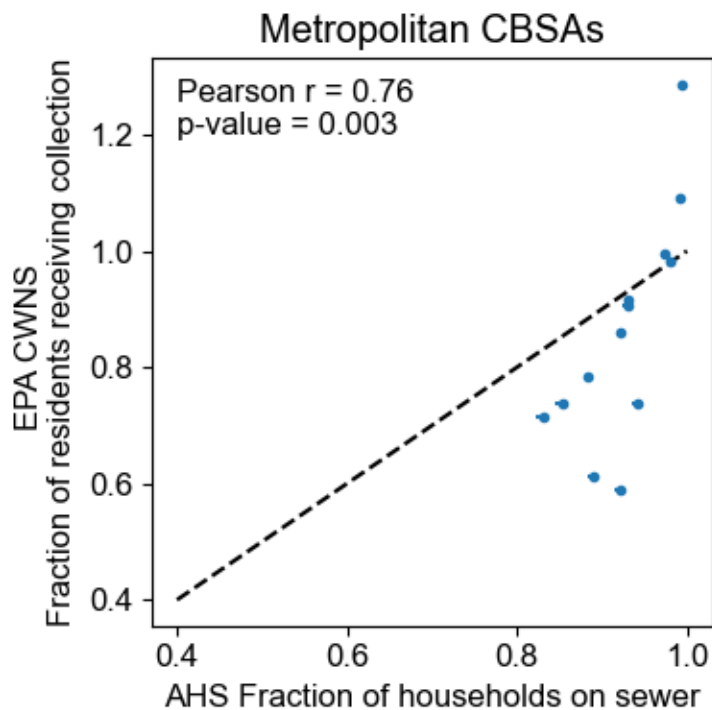

1155  
1156 **Fig S 12: Comparison of the 2012 EPA Clean Watersheds Needs Survey (CWNS) and the**  
1157 **2019 and 2021 U.S. Census American Housing Survey (AHS) datasets in core based**  
1158 **statistical areas (CBSA).** Data from the EPA CWNS are of the fraction of residents in the  
1159 CBSA receiving sewage collection. Data from the AHS are of the fraction of households in the  
1160 CBSA on sewer. Only CBSAs that were oversampled in the AHS data and were in states that  
1161 had more comprehensive responses in the EPA CWNS were included (see Methods). The  
1162 dashed black line shows  $y=x$  as a reference.

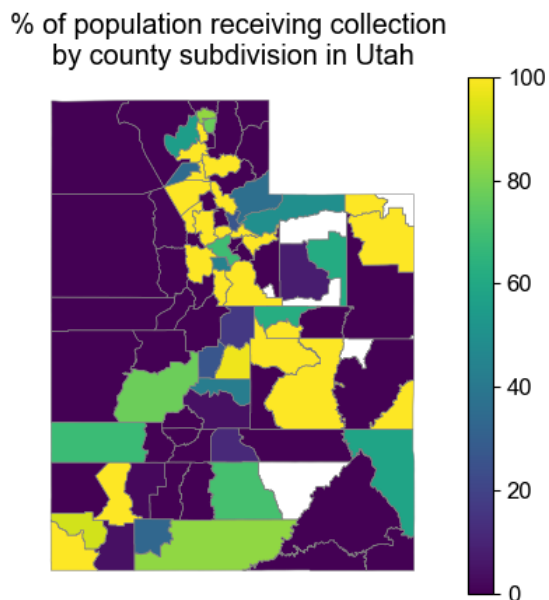

1163

1164 **Fig S 13: The percentage of the population that received wastewater collection by a**  
1165 **municipal utility in Utah by county subdivision of Utah.** Data are from the 2021 Utah  
1166 Municipal Wastewater Planning Survey. All values less than 0 are displayed as 0. County  
1167 subdivisions with fewer than 5 households or 20 population size are displayed in white. Note  
1168 that Indian reservations were not surveyed in this dataset.

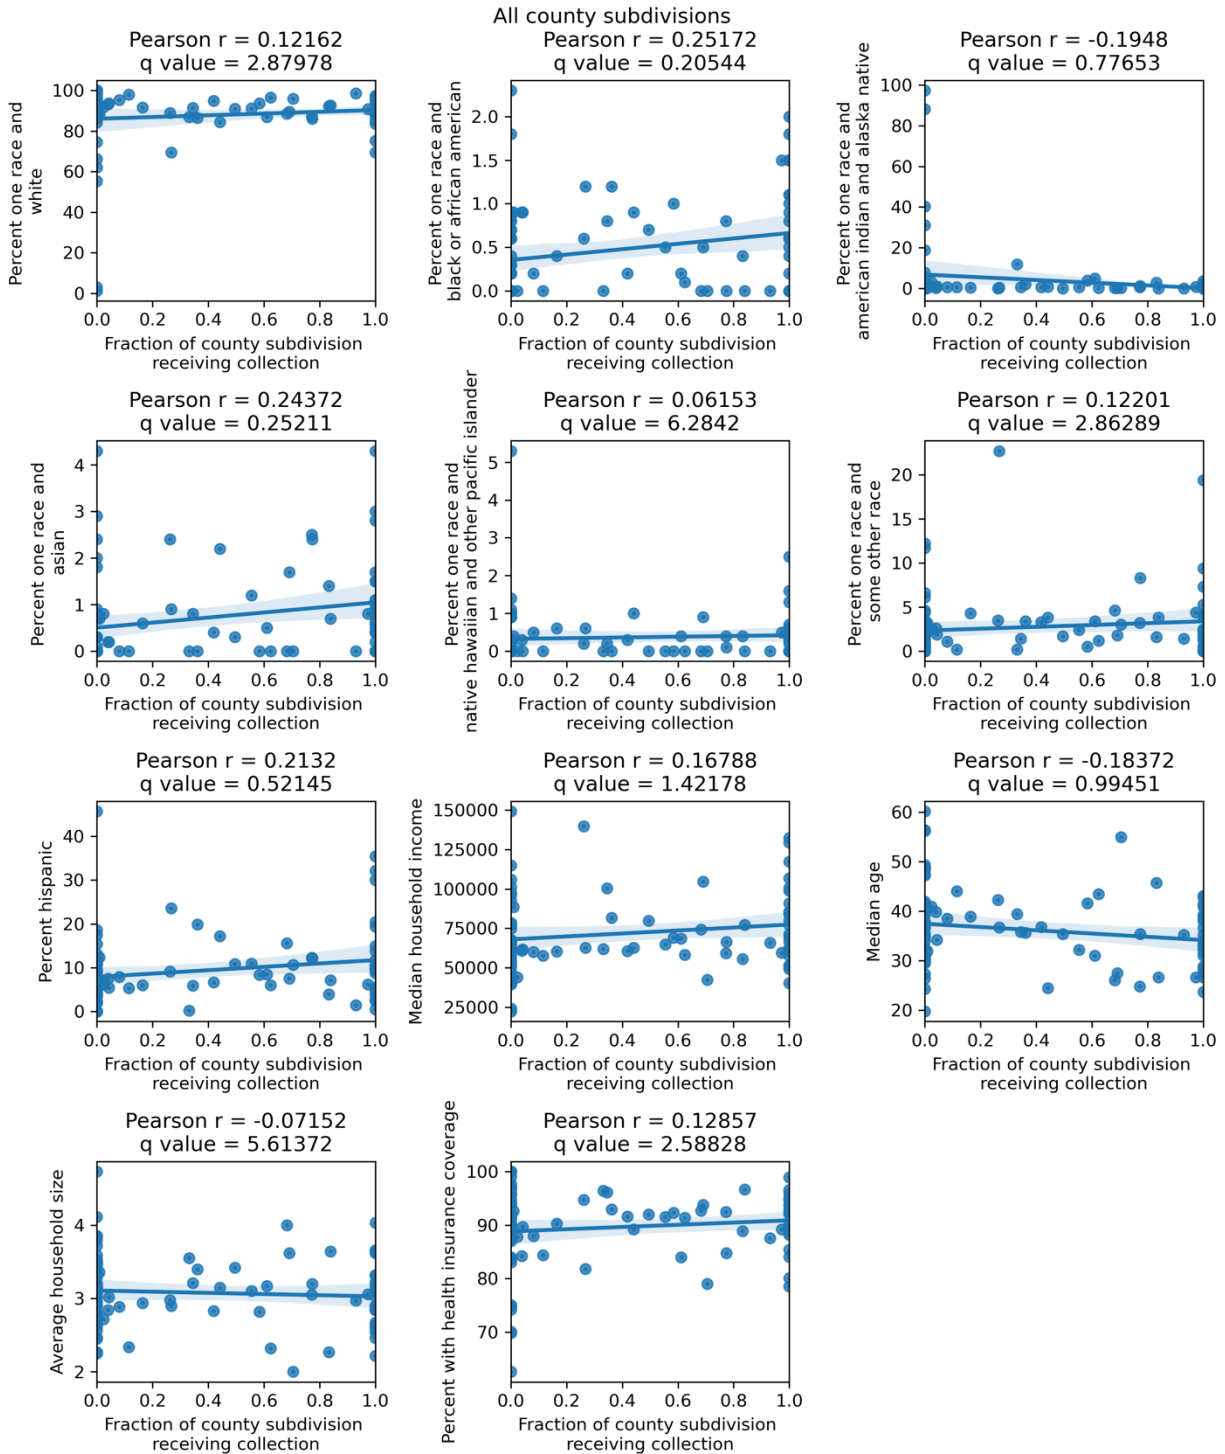

1169

1170 **Fig S 14: Correlation of fraction households in county subdivisions of Utah with**

1171 **wastewater collection with demographic and economic factors.** Data are from the 2021

1172 Utah Municipal Wastewater Planning Survey. Note that Indian reservations were not surveyed



1173 in this dataset. Values of the fraction of the county subdivision receiving collection greater than  
1174 1 were set to 1.  
1175

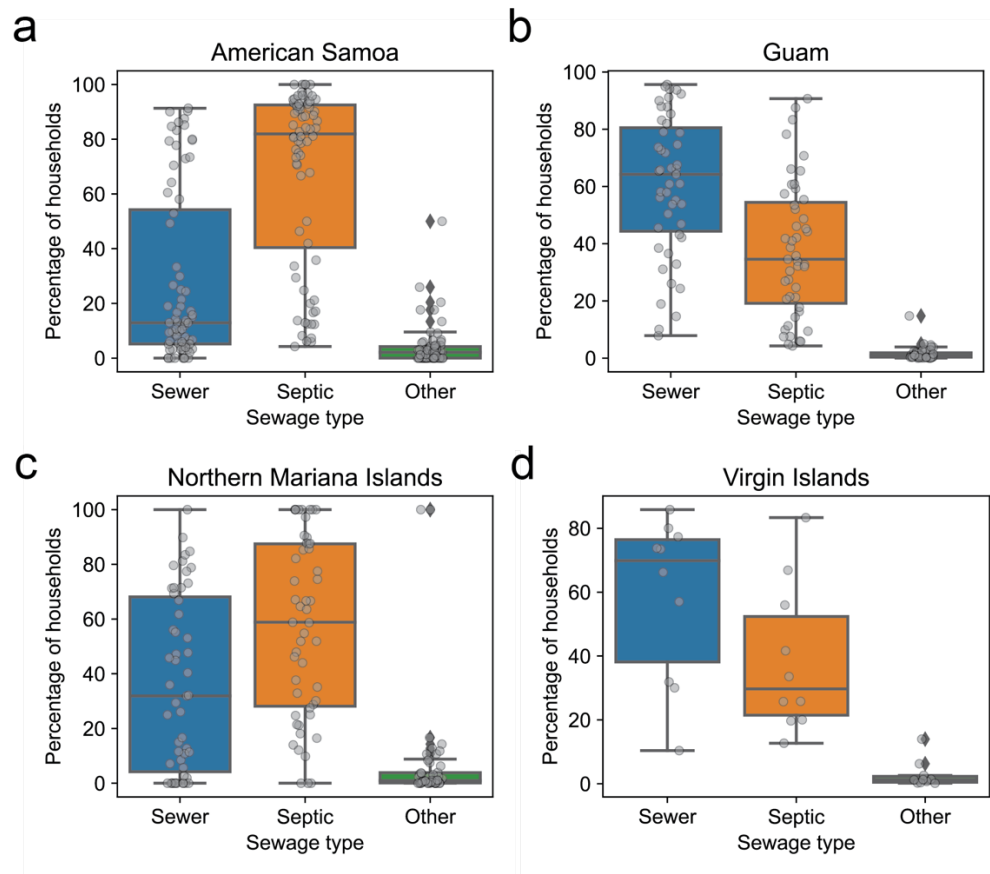

1176  
1177 **Fig S 15: Fraction of households by Census Designated Place that are connected to**  
1178 **sewers, septic tanks, or other forms of sewage disposal in the U.S. Island Areas. (a)**  
1179 **American Samoa, (b) Guam, (c) the Northern Mariana Islands, and (d) the Virgin Islands. Data**  
1180 **are from the 2020 U.S. Census Island Areas Decennial Survey.**

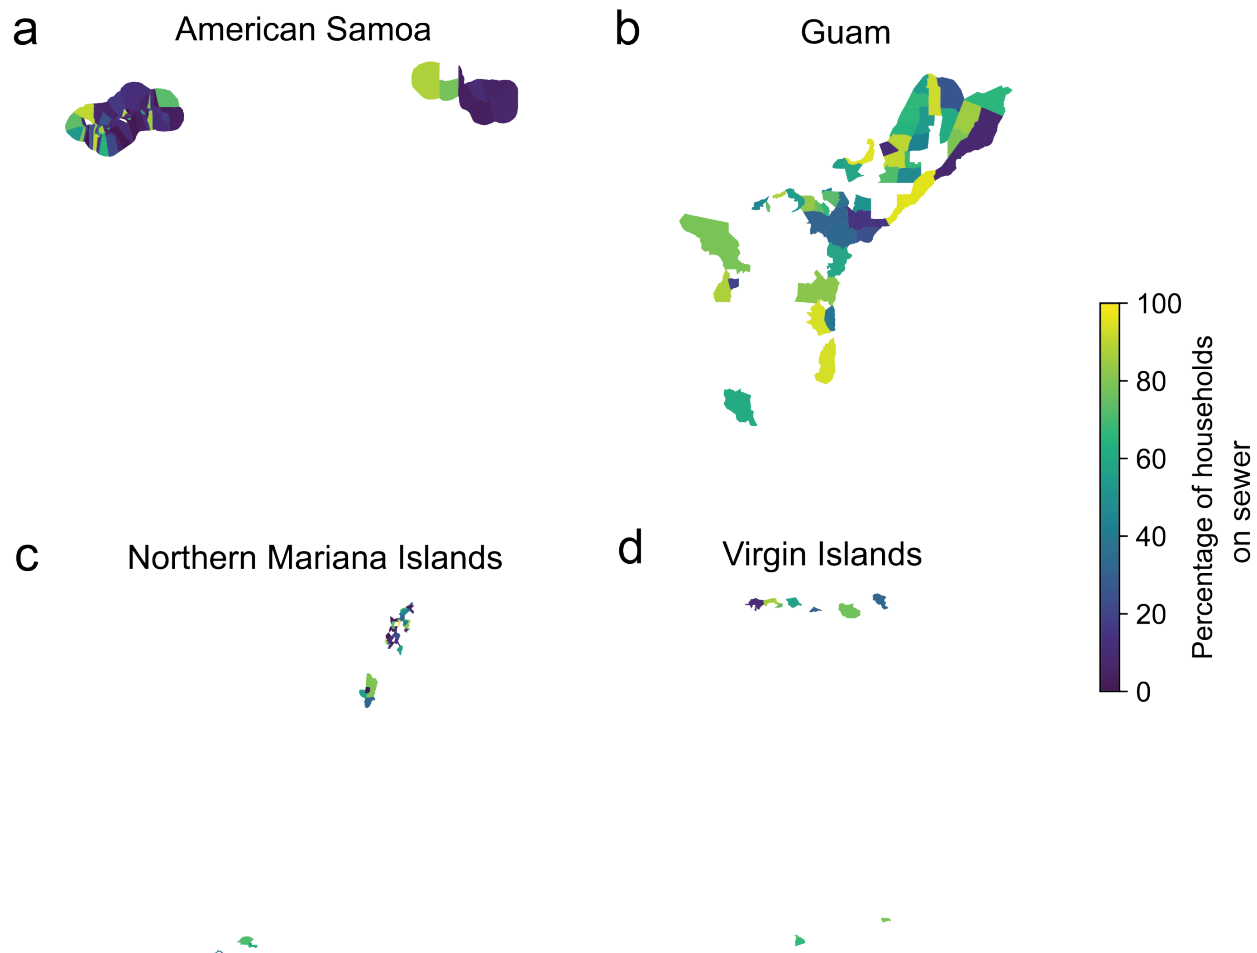

1181

1182 **Fig S 16: Map of fraction of households connected to sewers by Census Designated**

1183 **Place.** (a) American Samoa, (b) Guam, (c) the Northern Mariana Islands, and (d) the Virgin

1184 Islands. Data are from the 2020 U.S. Census Island Areas Decennial Survey.

1185

1186

1187 **Supplementary tables**

1188 **Table S 1: Counties in the US with  $\geq 5\%$  of occupied housing units lacking complete**  
 1189 **plumbing facilities.** Data are from the 2021 U.S. Census American Community Survey.

|    | <b>County, State</b>                    | <b>Percent of occupied housing units lacking complete plumbing facilities</b> |
|----|-----------------------------------------|-------------------------------------------------------------------------------|
| 0  | Yukon-Koyukuk Census Area, Alaska       | 36.1                                                                          |
| 1  | Bethel Census Area, Alaska              | 31.1                                                                          |
| 2  | Kusilvak Census Area, Alaska            | 25.3                                                                          |
| 3  | Nome Census Area, Alaska                | 24.5                                                                          |
| 4  | Northwest Arctic Borough, Alaska        | 20                                                                            |
| 5  | Denali Borough, Alaska                  | 18.1                                                                          |
| 6  | Lake and Peninsula Borough, Alaska      | 13.8                                                                          |
| 7  | Apache County, Arizona                  | 12.8                                                                          |
| 8  | Dillingham Census Area, Alaska          | 12                                                                            |
| 9  | Southeast Fairbanks Census Area, Alaska | 11.1                                                                          |
| 10 | North Slope Borough, Alaska             | 10.8                                                                          |
| 11 | Haines Borough, Alaska                  | 10.5                                                                          |
| 12 | Copper River Census Area, Alaska        | 10.1                                                                          |
| 13 | San Juan County, Utah                   | 10                                                                            |
| 14 | Adams County, Indiana                   | 9.7                                                                           |
| 15 | McKinley County, New Mexico             | 9.6                                                                           |

|    |                                           |     |
|----|-------------------------------------------|-----|
| 16 | Oglala Lakota County, South Dakota        | 9.2 |
| 17 | Hoonah-Angoon Census Area, Alaska         | 7.6 |
| 18 | Mora County, New Mexico                   | 7.6 |
| 19 | Navajo County, Arizona                    | 7   |
| 20 | Prince of Wales-Hyder Census Area, Alaska | 6.7 |
| 21 | Lawrence County, Mississippi              | 6.2 |
| 22 | Catahoula Parish, Louisiana               | 6.1 |
| 23 | Hudspeth County, Texas                    | 6.1 |
| 24 | Fairbanks North Star Borough, Alaska      | 5.6 |
| 25 | Salinas Municipio, Puerto Rico            | 5.1 |
| 26 | Yakutat City and Borough, Alaska          | 5.1 |

1190

1191

1192 **Table S 2: Correlation of the fraction of households by county connected to public**  
 1193 **sewers and different demographic or economic factors, stratified by state and**  
 1194 **Metropolitan, Micropolitan, and Rural Statistical Areas.** Only correlations that are significant  
 1195 (q-value<=0.05) are shown.

| Demographic or economic variable | Metropolitan, Micropolitan, or Rural Statistical Area |                               | Pearson |         |
|----------------------------------|-------------------------------------------------------|-------------------------------|---------|---------|
|                                  | State                                                 |                               | r       | q-value |
| Median income                    | FL                                                    | Micropolitan Statistical Area | 0.98    | 9.8E-03 |
| Percent Hispanic                 | FL                                                    | Metropolitan Statistical Area | 0.53    | 1.8E-02 |
| Percent one race and Asian       | MN                                                    | Metropolitan Statistical Area | 0.72    | 2.3E-03 |
|                                  | FL                                                    | Metropolitan Statistical Area | 0.52    | 3.0E-02 |
|                                  | MN                                                    | Metropolitan Statistical Area | 0.73    | 1.1E-03 |

Percent one race and

|                           |    |                               |       |         |
|---------------------------|----|-------------------------------|-------|---------|
| Black or African American | MI | Metropolitan Statistical Area | 0.67  | 1.4E-02 |
|                           | MN | Metropolitan Statistical Area | -0.74 | 7.6E-04 |
| Percent one race and      | MI | Metropolitan Statistical Area | -0.71 | 4.6E-03 |
| White                     | IA | Metropolitan Statistical Area | -0.69 | 5.0E-02 |

1196

1197

1198

1199 **Table S 3: Additional datasets discussed in the Supplementary Information but excluded**

1200 **from the main text due to data incompleteness and potential biases.**

| Dataset                                                 | Location  | Year(s) | Description                                                                                                                            | Sampling method                                                                                                                                                                                                                                                                                                  | Dataset completeness and potential biases                                                                                                                                                                                                                                                                                                          | Ref. |
|---------------------------------------------------------|-----------|---------|----------------------------------------------------------------------------------------------------------------------------------------|------------------------------------------------------------------------------------------------------------------------------------------------------------------------------------------------------------------------------------------------------------------------------------------------------------------|----------------------------------------------------------------------------------------------------------------------------------------------------------------------------------------------------------------------------------------------------------------------------------------------------------------------------------------------------|------|
| Utah Municipal Wastewater Planning Survey               | Utah      | 2021    | This survey reported the population receiving collection by each municipal utility that owns or operates a sanitary sewerage system.   | The survey completed was by treatment plant operators. Participation was reported in the survey information as being mandatory.                                                                                                                                                                                  | Of those contacted, 71% responded to the survey [47]. In some county subdivisions, >100% of the population appeared connected to sewers, likely due to errors in estimation, differences in how combined treatment and collection facilities reported population estimates, or collection populations residing in neighboring county subdivisions. | [47] |
| Minnesota Wastewater Infrastructure Needs Survey (WINS) | Minnesota | 2021    | Communities (places and townships) responded to the question "does your community have a collection system?" (yes/no/did not respond). | This was a voluntary survey.                                                                                                                                                                                                                                                                                     | Some communities (number unknown) did not respond to the survey.                                                                                                                                                                                                                                                                                   | [48] |
| Minnesota Subsurface Sewage Treatment Systems (SSTS)    | Minnesota | 2017    | This dataset reports the number of subsurface sewage treatment systems (SSTS) in various local government units.                       | Surveys were sent to local government units with a known SSTS program. According to the SSTS Annual Report [49], 'some of the data is "hard" data, such as the reported number and types of permits issued. Other data is considered "soft" data, such as the reported best estimates provided to determine SSTS | Two hundred and eleven out of 218 known SSTS programs submitted an annual report. Not all SSTS programs were identified and contacts were not always provided. Fourteen reported having zero SSTS within their jurisdiction despite permitting SSTS in 2017.                                                                                       | [49] |

|  |  |  |  |                                                                                  |  |  |
|--|--|--|--|----------------------------------------------------------------------------------|--|--|
|  |  |  |  | compliance rates and, sometimes, the total number of SSTS in each jurisdiction.' |  |  |
|--|--|--|--|----------------------------------------------------------------------------------|--|--|

1201

1202 **Table S 4: Manual changes community names reported in the Minnesota Wastewater**

1203 **Infrastructure Needs Survey to be able to match with a U.S. Census Designated Place.**

| Original name in dataset                               | Edited name for merging with Census Designated Place name | Note                                                                                                                   |
|--------------------------------------------------------|-----------------------------------------------------------|------------------------------------------------------------------------------------------------------------------------|
| St X (i.e. St Paul)                                    | St. X (i.e. St. Paul)                                     |                                                                                                                        |
| Plainview - Elgin Sanitary District                    | [Deleted]                                                 | There was another entry for Plainview (same zip code) with the same response for whether there was collection facility |
| Clear Lake - Clearwater Sewer Authority                | Clear Lake                                                |                                                                                                                        |
| Tower-Breitung Wastewater Board                        | Tower                                                     |                                                                                                                        |
| Birchwood                                              | Birchwood Village                                         |                                                                                                                        |
| Coleraine, Bovey, Taconite Joint Wastewater Commission | [Deleted]                                                 | Two entries for Coleraine with same zip code and similar population sizes                                              |
| Glacial Lakes Sanitary Sewer and Water District        | [Deleted]                                                 | Two entries for Spicer with same zip code and similar population sizes                                                 |

|                                                    |             |                                                                                                   |
|----------------------------------------------------|-------------|---------------------------------------------------------------------------------------------------|
| Central Iron Range Sanitary Sewer District         | [Deleted]   | Two entries for Chisholm with same zip code and similar population sizes                          |
| Shorewood Park Sanitary District                   | [Deleted]   | Two entries for Rush City with same zip code. Deleted the entry with the smaller population size. |
| Rich Prairie Water & Sewer District (Pierz/Genola) | Pierz       |                                                                                                   |
| Pine River Area Sanitary District                  | Pine River  |                                                                                                   |
| Moose Lake Windemere Area Sanitary Sewer District  | [Deleted]   | Two entries for Moose Lake with same zip code. Deleted the entry with no reported population      |
| Alexandria Lakes Area Sanitary District            | Alexandria  |                                                                                                   |
| North Long Lake Sewer District                     | Brainerd    |                                                                                                   |
| Serpent Lake Sanitary Sewer District               | Crosby      |                                                                                                   |
| Blomkest/Svea Sewer Board                          | Blomkest    |                                                                                                   |
| GEM Sanitary District                              | Greenwald   |                                                                                                   |
| Chisago Lakes Joint Sewage Treatment Commission    | Center City |                                                                                                   |



|                                        |           |                                                                                                                       |
|----------------------------------------|-----------|-----------------------------------------------------------------------------------------------------------------------|
| Duluth                                 | [Deleted] | 3 entries in Duluth - kept the one with the largest population size (Western Lake Superior Sanitary District (WLSSD)) |
| Duluth – North Shore Sanitary District | [Deleted] | 3 entries in Duluth - kept the one with the largest population size (Western Lake Superior Sanitary District (WLSSD)) |
| MCES - Metro Council Env. Services     | [Deleted] | Two entries in St. Paul. Deleted the entry with the smaller population size.                                          |

1204
